# Supplementary material for: An In Vitro Human Segmentation Clock Model Derived from Embryonic Stem Cells
Source: PubMed Central journal article supplement — Cell Rep. Author manuscript; Available in PMC 2019 Oct 25. (PMC6814198; doi:10.1016/j.celrep.2019.07.090), 2019-08-27
Supplement: NIHMS1538462-supplement-6.pdf [file NIHMS1538462-supplement-6.pdf]

## An *In Vitro* Human Segmentation Clock Model Derived from Embryonic Stem Cells

### Graphical Abstract

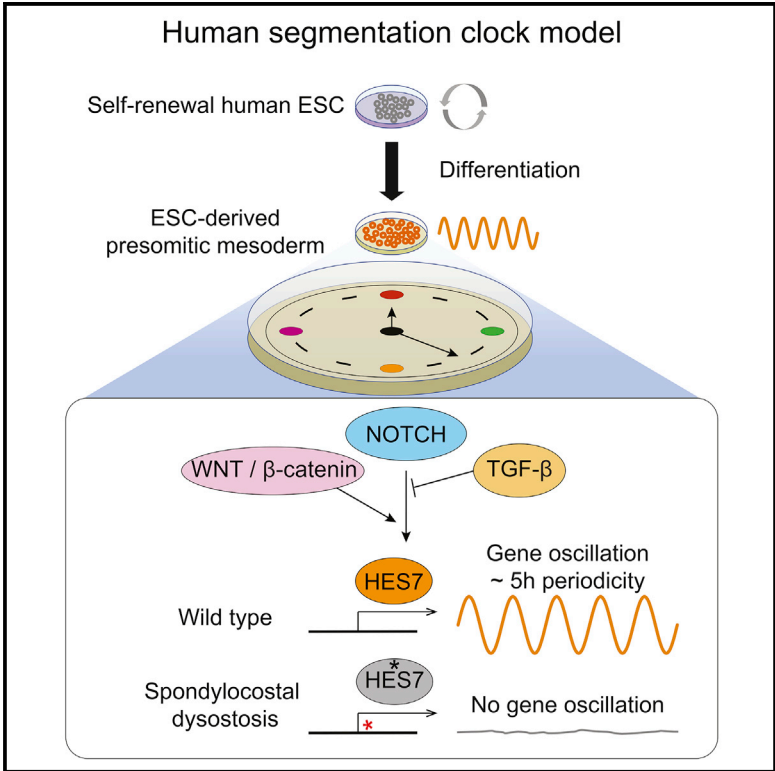

### Authors

Li-Fang Chu, Daniel Mamott, Zijian Ni, ..., Christina Kendziorski, Ron Stewart, James A. Thomson

### Correspondence

lchu@morgridge.org (L.-F.C.),  
jthomson@morgridge.org (J.A.T.)

### In Brief

The segmentation clock is a molecular oscillator regulating the tempo of somite formation in a species-specific manner. Chu et al. report an embryonic-stem-cell-derived model system displaying a human-specific gene oscillation periodicity, which can shed light on human somitogenesis and model skeletal developmental disorders.

### Highlights

- We captured a transitory somitogenesis gene-expression signature *in vitro*
- Human ESC-derived presomitic mesoderm exhibits synchronized *HES7* oscillation
- WNT activation and TGF-β inhibition are required to propagate *HES7* oscillation
- We established a model for spondylocostal dysostosis

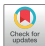

# An *In Vitro* Human Segmentation Clock Model Derived from Embryonic Stem Cells

Li-Fang Chu,<sup>1,\*</sup> Daniel Mamott,<sup>1</sup> Zijian Ni,<sup>2</sup> Rhonda Bacher,<sup>3</sup> Cathy Liu,<sup>1</sup> Scott Swanson,<sup>1</sup> Christina Kendziorski,<sup>2,4</sup> Ron Stewart,<sup>1</sup> and James A. Thomson<sup>1,5,6,7,\*</sup>

<sup>1</sup>Morgridge Institute for Research, Madison, WI 53715, USA

<sup>2</sup>Department of Statistics, University of Wisconsin–Madison, Madison, WI 53706, USA

<sup>3</sup>Department of Biostatistics, University of Florida, Gainesville, FL 32603, USA

<sup>4</sup>Department of Biostatistics and Medical Informatics, University of Wisconsin–Madison, Madison, WI 53792, USA

<sup>5</sup>Department of Cell and Regenerative Biology, University of Wisconsin–Madison, Madison, WI 53706, USA

<sup>6</sup>Department of Molecular, Cellular, & Developmental Biology, University of California, Santa Barbara, Santa Barbara, CA 93117, USA

<sup>7</sup>Lead Contact

\*Correspondence: [lchu@morgridge.org](mailto:lchu@morgridge.org) (L.-F.C.), [jthomson@morgridge.org](mailto:jthomson@morgridge.org) (J.A.T.)

<https://doi.org/10.1016/j.celrep.2019.07.090>

## SUMMARY

Defects in somitogenesis result in vertebral malformations at birth known as spondylocostal dysostosis (SCDO). Somites are formed with a species-specific periodicity controlled by the “segmentation clock,” which comprises a group of oscillatory genes in the presomitic mesoderm. Here, we report that a segmentation clock model derived from human embryonic stem cells shows many hallmarks of the mammalian segmentation clock *in vivo*, including a dependence on the NOTCH and WNT signaling pathways. The gene expression oscillations are highly synchronized, displaying a periodicity specific to the human clock. Introduction of a point of mutation into HES7, a specific mutation previously associated with clinical SCDO, eliminated clock gene oscillations, successfully reproducing the defects in the segmentation clock. Thus, we provide a model for studying the previously inaccessible human segmentation clock to better understand the mechanisms contributing to congenital skeletal defects.

## INTRODUCTION

The periodic development of symmetrical somite pairs during vertebrate embryogenesis is controlled by a molecular oscillator known as the segmentation clock (Palmeirim et al., 1997; Dale and Pourquié, 2000; Jiang et al., 2000; Gomez et al., 2008; Tam, 1981) that operates in the presomitic mesoderm (PSM). In humans, the first somite begins to form during Carnegie stage 9 (between 19 to 21 days), eventually resulting in a total of 42–44 somite pairs (Müller and O’Rahilly, 1986; Tam, 1981). The NOTCH signaling pathway plays a crucial role regulating gene oscillation during somitogenesis (Dale and Pourquié, 2000; Jiang et al., 2000; Dequéant et al., 2006; Lewis et al., 2009; Gibb et al., 2010; Hubaud and Pourquié, 2014). In particular, mutations in the NOTCH signaling pathway components and downstream

targets, including *DLL3*, *MESP2*, *LFNG*, and *HES7*, all cause congenital vertebral malformation, likely due to defects occurring during somitogenesis (Bulman et al., 2000; Whittock et al., 2004; Sparrow et al., 2006, 2008, 2010, 2012). In mice, *Hes7* null mutation causes neonatal lethality, whereas steady-state expression of *Hes7* eliminates the oscillatory expression pattern (Bessho et al., 2001b, 2003). Remarkably, accelerating the tempo of *Hes7* oscillation results in both faster somite formation and growth of additional numbers of vertebrate (Takashima et al., 2011; Harima et al., 2013). These data strongly argue that *Hes7* is a key driver of the mouse segmentation clock. However, whether human *HES7* displays a cyclic expression pattern in PSM cells is currently unknown. Comparisons of the transcriptomic data between model organisms display divergence of the segmentation clock genes as well as critical signaling differences (Xi et al., 2017; Chal et al., 2015; Krol et al., 2011). Given these disparities, we reasoned that a segmentation clock system derived from human embryonic stem cells (ESCs) might serve as a more relevant model to understand the human segmentation clock and to elucidate mechanisms of developmental disorders.

There are several published protocols for differentiation of human pluripotent stem cells (PSCs) into somites and their derivatives (Chal et al., 2015; Loh et al., 2016; Xi et al., 2017; Nakajima et al., 2018; Russell et al., 2018). A recent study using single-cell RNA-sequencing (scRNA-seq) analyses found that the cells pass through a transitory state that displays gene expression signatures similar to somitomeres before specifying into somite cells (Loh et al., 2016); however, no oscillatory gene expression pattern has been reported. Our prior studies found that species-specific developmental timing is conserved even in the *in vitro* environment (Barry et al., 2017), thus we hypothesized that the segmentation clock would remain operative *in vitro*. To test the hypothesis, we performed RNA-seq on human ESC-derived PSM cells every 30 min and captured a transient expression signature similar to somitogenesis. Next, we generated a segmentation clock reporter and detected a robust, synchronized *HES7* oscillation with a constant human specific periodicity of ~5 h. We demonstrated that chemical inhibition and conditional transgene expression could be directly employed to further dissect the signaling interplay during the initiation and

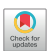

propagation of *HES7* oscillation. To demonstrate the utility of our system, we introduced a C to T transition in exon 2 of the endogenous *HES7* coding region (Sparrow et al., 2008). This single substitutional mutation (R25W) leads to a congenital vertebrae malformation condition known as spondylocostal dysostosis-4 (SCDO4; OMIM 608059) (Sparrow et al., 2008, 2010, 2012, 2013). In cells homozygous for the mutation, we observed a complete disruption of *HES7* oscillation in PSM cells. Altogether, we present a system to further understand the nature of the human segmentation clock as well as demonstrate the system's potential as a platform to model developmental disorders.

## RESULTS AND DISCUSSION

### RNA-Seq Analyses Identified a Transient Somitogenesis Program

We set out to derive human PSM cells from ESCs by adapting previously described protocols to induce a somite cell state (Nakajima et al., 2018; Loh et al., 2016; Chal et al., 2015; Xi et al., 2017). Human ESCs were stepwise differentiated in chemically defined medium, first to mesendoderm by culturing cells in “mesendoderm medium” (which activates WNT, transforming growth factor  $\beta$  [TGF- $\beta$ ], and fibroblast growth factor [FGF] signaling pathways), then to PSM by culturing cells for the second day in “PSM medium” (which activates WNT and FGF signaling but inhibits TGF- $\beta$  and BMP4 signaling), and lastly to somite cells by culturing cells for the third day in “somite medium” (inhibition of WNT, FGF, BMP [bone morphogenetic protein], and TGF- $\beta$  signaling pathways) (Figures 1A and S1A; see STAR Methods for further details). Under these conditions, the expression of paraxial mesoderm and PSM markers (*TBX6*, *HES7*), as well as somite markers (*MEOX1*, *DLL1*, *FOXC2*, *TCF15/PARAXIS*) increased hundreds- to thousands-fold compared to undifferentiated cells (Figure S1B). Immunofluorescent staining and RNA-seq results confirmed the downregulation of pluripotency markers (*POU5F1*, *NANOG*, *DNMT3B*, *ZFP42*, *LIN28A*), followed by sequential and uniform upregulation of markers representing mesendoderm (*T*, *MIXL1*, *NODAL*, *GSC*), paraxial mesoderm (*TBX6*, *MSGN1*), and somite (*MEOX1*, *FOXC2*, *PAX3*, *TCF15/PARAXIS*, *RIPPLY1*) (Figures 1A and 1B). Thus, the progression of human ESC differentiation toward somite cells are highly aligned with the known marker expression during mammalian somitogenesis *in vivo* (Hubaud and Pourquié, 2014; Oates et al., 2012; Chal et al., 2018; Chal and Pourquié, 2017; Hicks and Pyle, 2015).

To investigate the potential of dynamic gene expression pattern during differentiation, we performed RNA-seq collecting samples every 30 min during the first 12 h immediately following the switch to the somite medium. Principal component analysis (PCA) was employed to probe the transcriptomic transitions by reducing the dimensionality of RNA-seq data. Using the top 500 most variable genes across the entire time course, PCA revealed a highly coordinated, continuously progressive gene expression pattern over time (Figure 1C). Remarkably, a group of genes involved in somitogenesis and the segmentation clock were captured as a transitory expression signature, rising only after the downregulation of mesodermal markers but declining before the expression of somite markers (Figures 1D and S1C). Using correlation anal-

ysis, we further characterized these genes into three expression groups: (1) “early downregulated” (100 genes), (2) “transitory” (415 genes), or (3) “late upregulated” (162 genes) (Figure S1C). Gene Ontology (GO)-term enrichment analysis showed that early downregulated genes are enriched for terms including mesoderm morphogenesis and anterior-posterior axis specification; transitory genes are enriched for the NOTCH signaling pathway and mesenchymal cell development; and late upregulated genes are enriched for skeletal system development and spinal cord development (Figure S1C; Table S1). The transitory group of genes also displayed a relatively synchronized gene expression pattern. Specifically, at a time window from 300–450 min (5–7 h), after switching to somite medium, a group of transiently expressed somitogenesis genes peaked once before downregulation (Figure 1D). This transitory, co-activation pattern could also be detected at the single-cell level when the previously published scRNA-seq data characterizing *DLL1*-positive somitomere cells was reanalyzed (Loh et al., 2016). Temporal reordering of single cells using Wave-Crest followed with Trendy peak gene analyses (Chu et al., 2016; Bacher et al., 2017, 2018; Vermillion et al., 2018) (Figures S1D and S1E) highlighted a subset of somitogenesis genes (i.e., *LFNG*, *SNAI2*, *DLL1*, *HEYL*) displaying a co-expression pattern concentrated around a window of  $\sim$ 108–132 reordered cells (Figure S1E). Interestingly, the *HES7* expression displayed a flat pattern in this analysis (Figure S1E). Nonetheless, these results are consistent with our data that a transitory signature of somitogenesis gene expression can be detected during the transition from the PSM to the somite cell states (Figure 1D). To confirm our results, we further examined the expression of the segmentation clock genes (*HES7* and *LFNG*) and somite markers (*MEOX1* and *FOXC2*) by qRT-PCR. We found that *HES7* and *LFNG* expression peaked once when the cells were switched to the somite medium (Figure S1F) but peaked twice when the cells were maintained in the PSM medium (Figure S1G). As expected, *MEOX1* and *FOXC2* were highly induced in the somite medium (Figure S1F) but remained minimally expressed in PSM medium (Figure S1G). These results suggest that a more sustained gene oscillation profile (see further) is likely to be detected when cells are maintained in the PSM state.

### Generation of Segmentation Clock Reporter and Characterization of *HES7* Oscillation

To directly observe gene oscillation in real time, we tagged the endogenous *HES7* locus with *NanoLuc* (*NLuc*) Luciferase and *2A-tdTomato* cassettes via CRISPR-Cas9-mediated gene targeting (Hou et al., 2013; Chu et al., 2016; Zhang et al., 2017) (Figure 2A). A normal karyotype was confirmed after expansion of the correctly gene-targeted clones (Figures S2A–S2F). Human ESCs differentiated to the PSM state displayed cobblestone-like morphology and were highly proliferative and mobile (Video S1). At the PSM state, we detected robust expression of *HES7* reporter in the majority of cells (>95%~99%, Figure 2A; Video S1). To examine *HES7* gene oscillation, the *HES7* reporter line was differentiated toward PSM without switching to the somite medium (Figure 2B). At day three ( $\sim$ 72 h post differentiation), five to six cycles of *HES7* gene oscillation could be detected over  $\sim$ 32 h of real-time live cell luminescence recording. The initial number of cells seeded for differentiation is crucial for

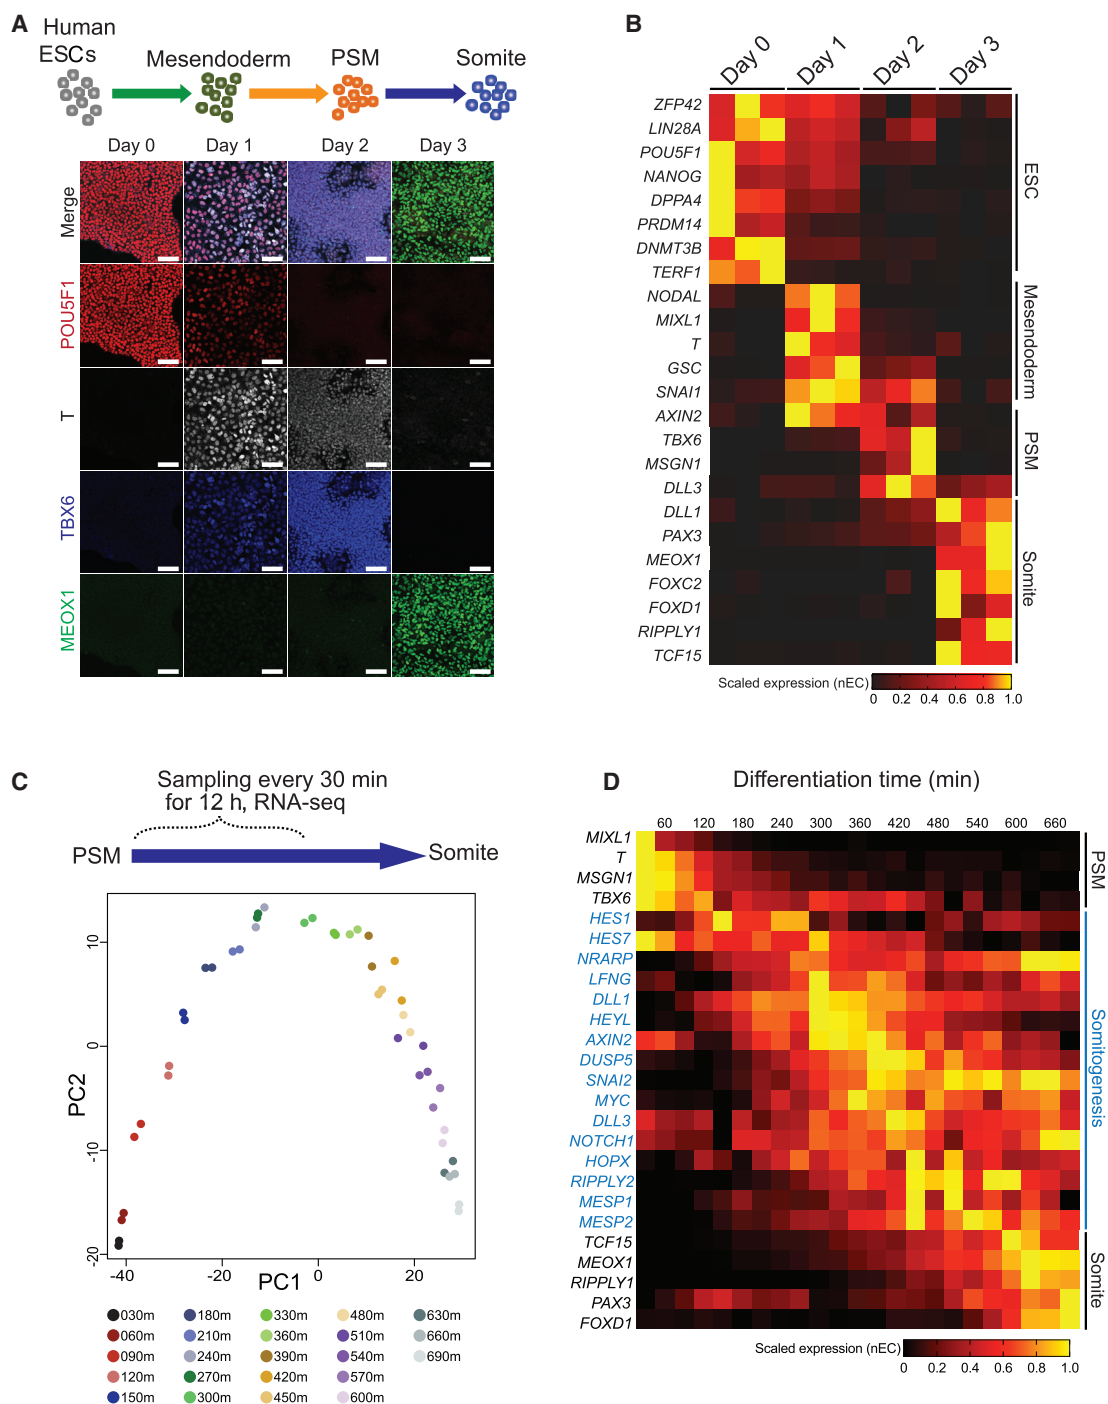

**Figure 1. Human ESC Differentiation to PSM and Somite Cell States**

(A) Schematic of differentiation strategy of human ESCs differentiation toward mesendoderm, PSM, and somite cell states. Immunofluorescence co-staining for POU5F1, T, TBX6, and MEOX1 for characterization of the differentiation protocol. All scale bars represent 100  $\mu$ m.

(B) Heatmap of RNA-seq data of the somite differentiation. Triplicate samples are shown for each time point. Selected markers are provided to represent the ESC, mesendoderm, PSM, and somite cell states.

(C) PCA of RNA-seq data collected every 30 min for the first 12 h after switching from PSM medium to somite medium. Each time point is collected in duplicates and are indicated by the color key.

(D) Heatmap of selected marker gene expression from the experiment in (C), representing PSM, somitogenesis (blue font), and somite cell states. All expression values (normalized expect counts [nECs]) are scaled minimum to maximum expression per gene row, indicated as a horizontal bar.

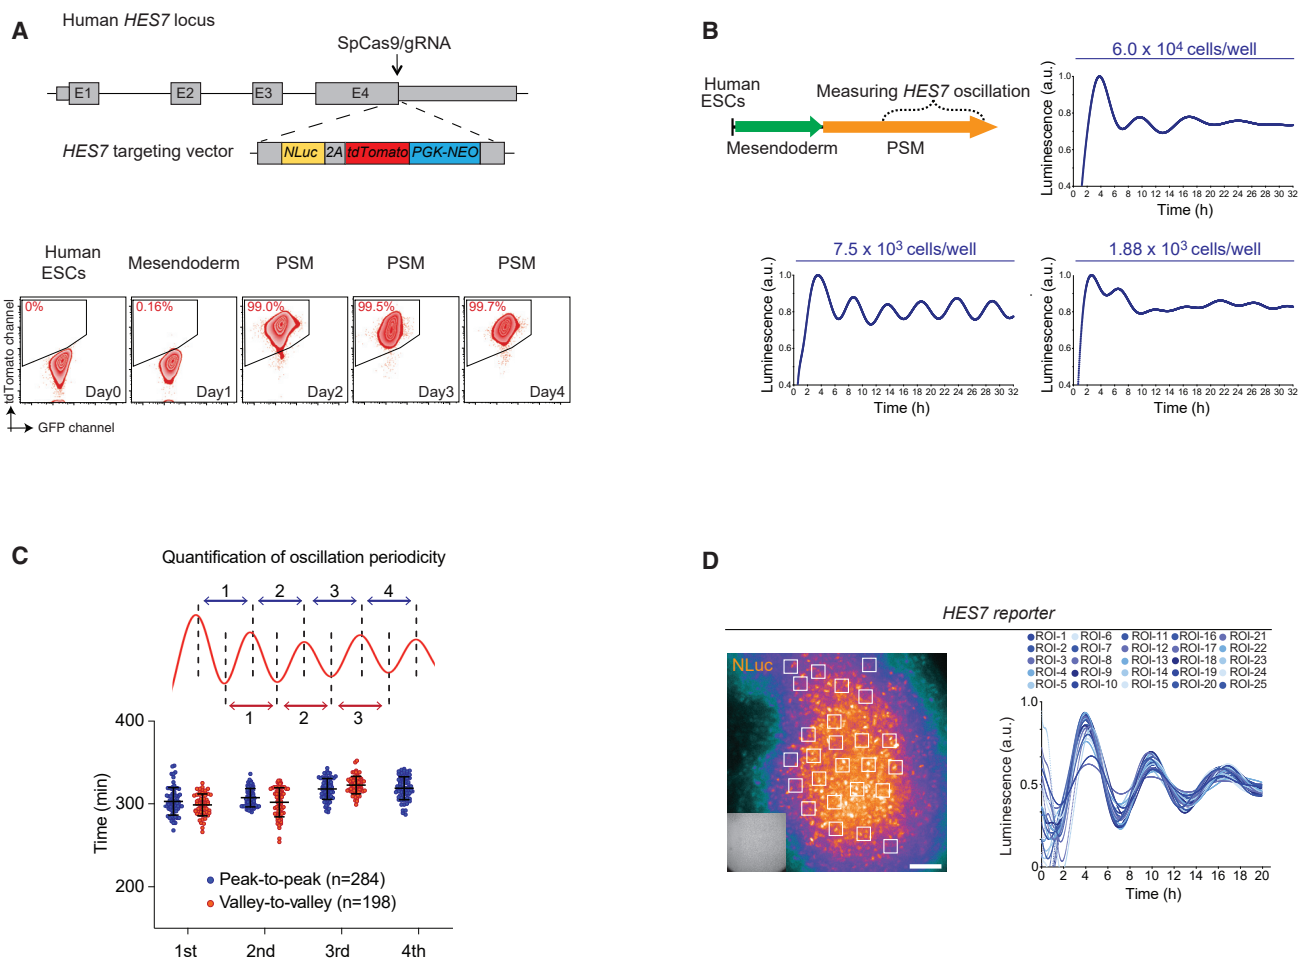

**Figure 2. Detection and Quantification of *HES7* Oscillation**

(A) Schematic of knock-in *HES7-NLuc-2A-tdTomato-PGK-NEO* cassette to the endogenous *HES7* locus. The arrow indicates the position of the SpCas9/guide RNA (gRNA) cut site. Grey boxes indicate the exons. The lower panel shows analysis by flow cytometry of *HES7*-reporter expression during the differentiation from human ESCs to PSM cells. The y axis indicates the tdTomato detection channel. The x axis indicates the GFP channel.

(B) Upper left panel: a schematic of the experimental strategy to measure *HES7* oscillation in PSM medium. Three subpanels indicated the cell density for differentiation to measure gene oscillation. The y axis indicates the luminescence signals (scaled from minimum to maximum from representative samples in arbitrary units [a.u.]). The x axis indicates 32 h of live cell luminescence detection.

(C) Upper panel: a schematic of the quantification of peak-to-peak (blue) and valley-to-valley (red) periodicity. The lower panel shows the quantification results. The y axis indicates minutes. The x axis indicates quantifications from the first to the fourth peaks.

(D) Left panel: an example frame of NLuc luminescence imaging experiments. Overlay shows the locations of 25 regions of interest (ROIs) indicated as white boxes. Right panel: the quantification results of 25 ROIs over 20 h of time-lapse imaging. The y axis indicates the luminescence signals (scaled from minimum to maximum from representative samples in a.u.). The time-lapse video is shown as [Video S2](#). Insert shows the corresponding bright field cell image. All scale bars represent 100  $\mu$ m.

detecting *HES7* oscillation. In serial dilution experiments, we tested cell seeding density across  $\sim 30$ -fold range ( $1.88 \times 10^3$  to  $6.0 \times 10^4$  cells per well seeding) and identified that an optimal density of  $7.5 \times 10^3$  cells per well ( $\sim 2.4 \times 10^4$  cells/cm<sup>2</sup> in 96-well plate) provided the most robust and reproducible *HES7* oscillation profile (Figure 2B). Strikingly, the sinusoidal oscillation profile is highly consistent across independent differentiation experiments, displaying comparable peak-to-peak (311 min  $\pm$  15.1 SD) and valley-to-valley (308 min  $\pm$  17.6 SD) cycle time (Figure 2C). Thus, our experimental observation of  $\sim 5$ -h periodicity of *HES7* oscillation supports the estimated 4–6 h of human somi-

togenesis periodicity (Müller and O’Rahilly, 1986; Hubaud and Pourquié, 2014; Sparrow et al., 2007).

Using luminescence imaging analysis, we observed predominantly synchronized *HES7* oscillatory expression across a field of PSM cells (Figure 2D; Video S2). As a control for imaging analysis, gene oscillation was never observed when *NLuc* expression was driven by a constitutive promoter (*EF1a*) (Figure S2G). To confirm synchronization at the single cell level, we mixed parental H1 human ESCs with *HES7* reporter cells (at a ratio of 100:1) and examined their differentiation to PSM using luminescence imaging. Quantification of diluted reporter cells revealed that single

cells distantly located from the larger clusters of cells still oscillated in a synchronized manner (Figure S2H). We therefore concluded that *HES7* oscillation is a synchronized behavior among a population of PSM cells. A recent study using mouse ESC-derived PSM cells detected *Hes7* reporter oscillation propagating from central-to-peripheral directions, accompanied with segmentation-like features *in vitro* (Matsumiya et al., 2018). While our imaging analysis detected robust *HES7* oscillation (Figures 2A and S2H; Video S2), we did not observe morphological features mimicking segmentation formation *in vitro*. We reason that our fully chemically defined medium provides an environment to “lock in” the PSM state and should be advantageous for dissecting the signaling requirement for propagating gene oscillation (see further).

Following this rationale, we next determined the roles of key signaling pathways on *HES7* oscillation using small molecule inhibitors or conditional transgene expression (Jiang et al., 2000; Lewis et al., 2009; Gibb et al., 2010). As expected, reduced intracellular NOTCH signaling by DAPT (a  $\gamma$ -secretase inhibitor) treatment quickly diminished *HES7* oscillation (Figure 3A, left panel). Overexpression of NOTCH signaling by *NOTCH Intracellular Domain* (*NICD*) or *HES7* transgene induction (+doxycycline [DOX]) also eliminated *HES7* oscillation (Figure 3A, middle and right panels). These results support previous studies that constitutive expression of NOTCH signaling pathway components will render a non-oscillatory profile (Harima et al., 2013). WNT signaling pathways are also known to contribute to the NOTCH-driven segmentation clock (Dubrulle et al., 2001; Aulehla et al., 2003; Dequéant et al., 2006; Niwa et al., 2007; Sonnen et al., 2018; Naiche et al., 2011). Inhibition of conical WNT signaling via *AXIN2* stabilization (using the small molecules IWR1 or XAV939) all dampened *HES7* oscillation (Figure S3A). In addition, disrupting *MYC-MAX* dimerization or interfering with the ability of *MYC* to regulate its transcriptional targets (using the small molecules 10058-F4 or (+)-JQ1) also eliminates *HES7* oscillation (Figure S3B), corroborating a recent report that *Myc* activity is required for segmentation clock gene oscillation in mice (Mastromina et al., 2018). Together, these data indicate that *HES7* oscillation in human ESC-derived PSM cells recapitulates many features of segmentation clock *in vivo*. We thus conclude that the maintenance of the human segmentation clock *in vitro* requires a delicate balance among multiple signaling pathways (Dubrulle et al., 2001; Hubaud and Pourquié, 2014; Mastromina et al., 2018; Matsumiya et al., 2018; Sonnen et al., 2018).

#### Activation of WNT and TGF- $\beta$ Inhibition Are Required to Propagate *HES7* Oscillation

We next attempted to determine the minimal number of signaling pathways required to induce and propagate *HES7* oscillation from the mesendoderm state. We examined the impact of combinations or drop-outs of the four major signaling components or growth factors, namely A83-01 (TGF- $\beta$  inhibition), CHIR99021 (CH, WNT activation), FGF2, and NOGGIN (BMP4 inhibition) in the PSM medium on the second day (~24 h post differentiation) (Figures 3B and S3C). As a control, the first peak of *HES7* oscillation was detected as early as 6–8 h after switching to PSM medium (~30–32 h post differentiation) (Figure 3B, left panel). Interestingly, none of the single small molecules or growth

factors were sufficient to induce *HES7* oscillation even though *HES7* was expressed in a significant portion of cells (~40% to >90%) (Figure S3C, conditions 2–6). Dual combinations revealed that supplying only A83-01 and CH in the base medium was sufficient to induce *HES7* oscillation (Figure 3B, middle panel; Figure S3C, condition 7). When either A83-01 or CH was removed from the PSM medium, *HES7* oscillation was disrupted (Figure 3B, right panel; Figure S3C, conditions 13–14). Importantly, antagonizing TGF- $\beta$  signaling alone renders a ~5-fold higher activation of *HES7* compared to control (Figure S3E). These results indicate that TGF- $\beta$  signaling is crucial to suppress *HES7* activation. Applying small molecules RepSox or SB-431542 (SB), which also target *TGFBR1* (also known as *ALK5*) (Inman et al., 2002; Laping et al., 2002; Ichida et al., 2009; Tojo et al., 2005), had similar effects on *HES7* activation (Figure S3E). Combining CH with RepSox or SB was sufficient to induce *HES7* oscillation (Figure S3D). We therefore conclude that both WNT activation and TGF- $\beta$  inhibition are required for oscillations from the mesendoderm state. Interestingly, TGF- $\beta$  signaling inhibition alone renders a higher expression of total luminescence signals, while the PSM medium induced a more uniform population activation of *HES7* (Figures S3C and S3E). Collectively, these results corroborate with a recent report that observed the downregulation of the TGF- $\beta$  signaling pathway in developing, nascent human somites (Xi et al., 2017). Our data further suggest that reducing TGF- $\beta$  signaling is required for *HES7* oscillation in the PSM state.

#### Introducing *HES7* R25W Mutation to Model SCDO4

Mutations in *HES7* cause congenital abnormalities of vertebrae that manifest as an irregular formation of the vertebrae and ribs, known as spondylocostal dysostosis-4 (SCDO4) (Sparrow et al., 2008, 2010, 2013). This disorder is likely due to complications during somitogenesis (Sparrow et al., 2012), but how the mutations disrupt the process of somitogenesis is unknown. To examine the consequences of *HES7* mutation, we employed CRISPR-Cas9-mediated scarless gene editing (Liang et al., 2015, 2017; Richardson et al., 2016; Yang et al., 2013) to introduce a C to T transition (73C-T) in exon 2 of the *HES7* locus (Sparrow et al., 2008). This mutation results in a missense mutation in *HES7* protein (R25W) (Figure 3C). In this cohort of experiments, clones carrying both heterozygous (73 C/T) and homozygous (73 T/T) mutations were obtained (Figure S3F). In our conditions, *HES7* oscillation was completely eliminated in R25W homozygous clones but displayed a normal oscillation profile in heterozygous clones (Figures S3G and S3H) and controls (Figure 3D, left panel). This result is consistent with the observation that siblings of individuals with SCDO4 carrying only heterozygous mutations appears to be unaffected (Sparrow et al., 2008). We also observed a significant >3-fold increase of *HES7* expression in the R25W clones as measured by the luminescence signal intensity (Figure 3D, right panel). This is consistent with the notion that R25W mutation lies within the DNA binding domain and results in the inability of the *HES7* protein to repress its target genes, including its own promoter (Besho et al., 2001a, 2003). Together, these results demonstrate that *HES7* oscillation can be tractably employed to report on the function of the human segmentation clock (Figure 3E). We therefore anticipate that our *in vitro* system can serve as a

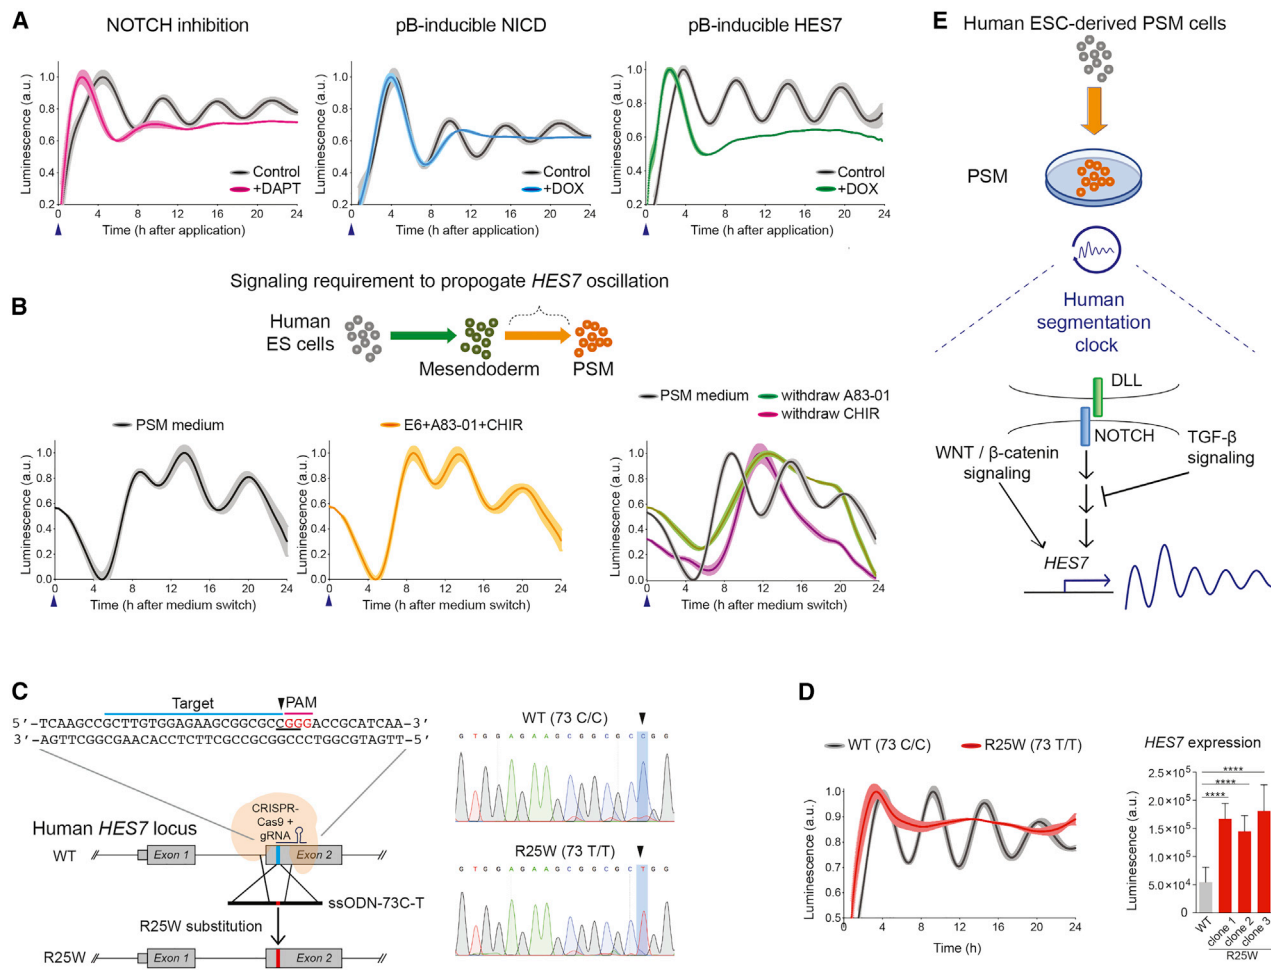

**Figure 3. Characterization of *HES7* Oscillation and Modeling SCDO4 with Genome Editing**

(A) The impact of modulating NOTCH signaling pathways on *HES7* oscillation. Left panel: DAPT treatment (magenta). Middle panel: inducible *NICD* transgene expression (blue). Right panel: inducible *HES7* transgene expression (green). The controls are shown in black. Blue arrowhead indicates when the NLuciferin and small molecules or DOX were applied. All luminescence oscillation data presented is scaled from minimum to maximum signal and shown as mean ± SEM (shaded area), obtained from 4 to 5 replicates in each experiment.

(B) A schematic for measuring the propagation of *HES7* oscillation. The lower panels show the comparison between PSM medium (black) and with base medium supplemented with A83-01 and CHIR (yellow) only. Right panel: PSM medium (black) compared with only withdrawal of A83-01 (green) or the withdrawal of CHIR (magenta).

(C) Strategy for genome editing to introduce a R25W substitution. The sequences for gRNA protospacer adjacent motif (PAM) domain (magenta) and targeted sequences (blue) are indicated. The codon to be mutated is underlined, CGG (Arg) to TGG (Trp). Right panel: Sanger sequencing results of the parental line (wild type [WT]) and a homozygous R25W clone.

(D) Representative oscillation profile of WT (black) overlay with a R25W clone (red). Right panel: quantification of *HES7* expression level between WT and R25W clones. \*\*\*\*p < 0.0001, Student's t test. Data presented as the mean ± SD.

(E) A proposed working model of human segmentation clock and *HES7* oscillation. NOTCH signaling is upstream of *HES7* activation and oscillation. During the transition from mesendoderm to PSM state, WNT/β-catenin signaling activation and TGF-β signaling inhibition are crucial to propagate *HES7* oscillation. Luminescence is measured in arbitrary units (a.u.).

modeling platform to further understand the mechanistic link between human gene mutations and congenital vertebral defects.

In conclusion, we report a human segmentation clock system *in vitro*. Our *HES7* reporter can be modulated by small molecule inhibitors or transgene expression, allowing us to dissect human-specific signaling dynamics (Figures 2 and 3). Specifically, the human clock displayed a ~5-h periodicity and is sensitive

to TGF-β signaling. Furthermore, the *in vivo* segmentation clock displays unidirectional, posterior-to-anterior traveling waves (Masamizu et al., 2006), while our system exhibits a radial or predominantly synchronized oscillation profile within a two-dimensional PSM colony (Figures 2A and S2H; Video S2). This may be due to the lack of an anterior-posterior signaling axis *in vitro*. Future efforts combining our system with a tunable signaling gradient (Sonnen et al., 2018) or with a cell culture device for

patterning cells (Warmflash et al., 2014) may allow for better modeling of the spatial context of the human segmentation clock.

One of the most fascinating features of somitogenesis is the species-specific periodicity of gene oscillation, which sets the tempo for each somite pair formation. Recently, a study reported mouse ESC-derived PSM cells that recapitulate a mouse segmentation clock of ~2.5-h periodicity (Matsumiya et al. 2018). This study further advances the idea that PSC-derived progenitors largely obey a species-specific developmental timing *in vitro* (Ebisuya and Briscoe, 2018; Barry et al., 2017). Improper human segmentation leads to congenital disorders such as SCDO or congenital scoliosis (Sparrow et al., 2006, 2008, 2010, 2012, 2013; Bulman et al., 2000; Whittock et al., 2004). We suggest that human ESC and/or patient-specific induced PSC (iPSC)-derived PSM cells can serve as a practical platform for modeling these disorders during this critical stage of human development.

## STAR★METHODS

Detailed methods are provided in the online version of this paper and include the following:

- KEY RESOURCES TABLE
- LEAD CONTACT AND MATERIALS AVAILABILITY
- EXPERIMENT MODEL AND SUBJECT DETAILS
- METHOD DETAILS
  - Human ESCs Maintenance and Differentiation
  - Gene Targeting and Construction of the HES7-NanoLuc-2A-tdTomato Reporter Cell Line
  - PiggyBac Transposon to Generate Inducible Transgenic Reporter Cell Lines
  - Genome Editing for Point Mutation by HDR in HES7 Reporter Cell Line
  - Live Cell Detection of NanoLuc Luminescence Activity and Quantification
  - Live Cell Imaging of NanoLuc Luminescence Activity and Quantification
  - RNA-Seq Library Preparation, Reads Processing, and Normalization
  - Immunofluorescence Staining and Confocal Image Analysis
  - Reverse Transcription (RT) and qPCR Analysis
- QUANTIFICATION AND STATISTICAL ANALYSIS
  - Oscillation Data Processing – Detrending of Raw Luminescence Data
  - Oscillation Data Analysis – Polynomial Fitting and Quantification of Oscillation Periodicity
  - Bulk High Temporal RNA-Seq Data Analysis – Principal Component Analysis, Pearson Correlation Analysis, and GO-Term Enrichment
  - Reanalysis of scRNA-Seq Data from Loh et al., 2016
  - Other Software
- DATA AND CODE AVAILABILITY

## SUPPLEMENTAL INFORMATION

Supplemental Information can be found online at <https://doi.org/10.1016/j.celrep.2019.07.090>.

## ACKNOWLEDGMENTS

We thank all members of the Thomson Laboratory for helpful comments on this study. We thank C. Barry, A. Freitag, Z. Hou, J. Lee, E. Syth, D. Vereide, and J. Zhang for critical reading and comments on the manuscript; J. Bolin and C. Argus for the preparation of the RNA-seq samples; and J. Steill for mapping reads for gene expression data and preparing for GEO submission. This work was supported by NIH 5UH3TR000506-05 (J.A.T.), 5U01HL099773-07 (J.A.T.), and GM102756 (C.K.), and the Morgridge Institute for Research.

## AUTHOR CONTRIBUTIONS

L.-F.C. and J.A.T. designed and conceptualized the study and wrote the manuscript. L.-F.C. and D.M. conducted all the experiments. Z.N. performed statistical analysis for bulk RNA-seq and developed algorithms for oscillation analysis. R.B. performed scRNA-seq analysis, temporal reordering, and Trendy analysis. C.L. performed image quantification and analysis. S.S. developed the algorithm for processing the luminescence data. C.K. and R.S. supervised the statistical methods and experimental designs. All authors read and approved the final manuscript.

## DECLARATION OF INTERESTS

The authors declare no competing interests.

Received: May 6, 2019

Revised: July 9, 2019

Accepted: July 24, 2019

Published: August 27, 2019

## REFERENCES

- Aulehla, A., Wehrle, C., Brand-Saberi, B., Kemler, R., Gossler, A., Kanzler, B., and Herrmann, B.G. (2003). *Wnt3a* plays a major role in the segmentation clock controlling somitogenesis. *Dev. Cell* 4, 395–406.
- Bacher, R., Chu, L.F., Leng, N., Gasch, A.P., Thomson, J.A., Stewart, R.M., Newton, M., and Kendziorski, C. (2017). SCnorm: robust normalization of single-cell RNA-seq data. *Nat. Methods* 14, 584–586.
- Bacher, R., Leng, N., Chu, L.F., Ni, Z., Thomson, J.A., Kendziorski, C., and Stewart, R. (2018). Trendy: segmented regression analysis of expression dynamics in high-throughput ordered profiling experiments. *BMC Bioinformatics* 19, 380.
- Barry, C., Schmitz, M.T., Jiang, P., Schwartz, M.P., Duffin, B.M., Swanson, S., Bacher, R., Bolin, J.M., Elwell, A.L., McIntosh, B.E., et al. (2017). Species-specific developmental timing is maintained by pluripotent stem cells *ex utero*. *Dev. Biol.* 423, 101–110.
- Bessho, Y., Miyoshi, G., Sakata, R., and Kageyama, R. (2001a). *Hes7*: a bHLH-type repressor gene regulated by Notch and expressed in the presomitic mesoderm. *Genes Cells* 6, 175–185.
- Bessho, Y., Sakata, R., Komatsu, S., Shiota, K., Yamada, S., and Kageyama, R. (2001b). Dynamic expression and essential functions of *Hes7* in somite segmentation. *Genes Dev.* 15, 2642–2647.
- Bessho, Y., Hirata, H., Masamizu, Y., and Kageyama, R. (2003). Periodic repression by the bHLH factor *Hes7* is an essential mechanism for the somite segmentation clock. *Genes Dev.* 17, 1451–1456.
- Bone, R.A., Bailey, C.S., Wiedermann, G., Ferjentsik, Z., Appleton, P.L., Murray, P.J., Maroto, M., and Dale, J.K. (2014). Spatiotemporal oscillations of Notch1, Dll1 and NICD are coordinated across the mouse PSM. *Development* 141, 4806–4816.
- Bulman, M.P., Kusumi, K., Frayling, T.M., McKeown, C., Garrett, C., Lander, E.S., Krumlauf, R., Hattersley, A.T., Ellard, S., and Turnpenny, P.D. (2000). Mutations in the human delta homologue, DLL3, cause axial skeletal defects in spondylocostal dysostosis. *Nat. Genet.* 24, 438–441.



- Butler, A., Hoffman, P., Smibert, P., Papalexli, E., and Satija, R. (2018). Integrating single-cell transcriptomic data across different conditions, technologies, and species. *Nat. Biotechnol.* **36**, 411–420.
- Chal, J., and Pourquié, O. (2017). Making muscle: skeletal myogenesis *in vivo* and *in vitro*. *Development* **144**, 2104–2122.
- Chal, J., Oginuma, M., Al Tanoury, Z., Gobert, B., Sumara, O., Hick, A., Bousson, F., Zidouni, Y., Mursch, C., Moncuquet, P., et al. (2015). Differentiation of pluripotent stem cells to muscle fiber to model Duchenne muscular dystrophy. *Nat. Biotechnol.* **33**, 962–969.
- Chal, J., Al Tanoury, Z., Oginuma, M., Moncuquet, P., Gobert, B., Miyanari, A., Tassy, O., Guevara, G., Hubaud, A., Bera, A., et al. (2018). Recapitulating early development of mouse musculoskeletal precursors of the paraxial mesoderm *in vitro*. *Development* **145**, dev157339.
- Chen, G., Gulbranson, D.R., Hou, Z., Bolin, J.M., Ruotti, V., Probasco, M.D., Smuga-Otto, K., Howden, S.E., Diol, N.R., Propson, N.E., et al. (2011). Chemically defined conditions for human iPSC derivation and culture. *Nat. Methods* **8**, 424–429.
- Chen, E.Y., Tan, C.M., Kou, Y., Duan, Q., Wang, Z., Meirelles, G.V., Clark, N.R., and Ma'ayan, A. (2013). Enrichr: interactive and collaborative HTML5 gene list enrichment analysis tool. *BMC Bioinformatics* **14**, 128.
- Chu, L.F., Surani, M.A., Jaenisch, R., and Zwaka, T.P. (2011). *Blimp1* expression predicts embryonic stem cell development *in vitro*. *Curr. Biol.* **21**, 1759–1765.
- Chu, L.F., Leng, N., Zhang, J., Hou, Z., Mamott, D., Vereide, D.T., Choi, J., Kendziorski, C., Stewart, R., and Thomson, J.A. (2016). Single-cell RNA-seq reveals novel regulators of human embryonic stem cell differentiation to definitive endoderm. *Genome Biol.* **17**, 173.
- Dale, K.J., and Pourquié, O. (2000). A clock-work somite. *BioEssays* **22**, 72–83.
- Dale, J.K., Malapert, P., Chal, J., Vilhais-Neto, G., Maroto, M., Johnson, T., Jayasinghe, S., Trainor, P., Herrmann, B., and Pourquié, O. (2006). Oscillations of the snail genes in the presomitic mesoderm coordinate segmental patterning and morphogenesis in vertebrate somitogenesis. *Dev. Cell* **10**, 355–366.
- Dequéant, M.L., Glynn, E., Gaudenz, K., Wahl, M., Chen, J., Mushegian, A., and Pourquié, O. (2006). A complex oscillating network of signaling genes underlies the mouse segmentation clock. *Science* **314**, 1595–1598.
- Dubrule, J., McGrew, M.J., and Pourquié, O. (2001). FGF signaling controls somite boundary position and regulates segmentation clock control of spatio-temporal Hox gene activation. *Cell* **106**, 219–232.
- Ebisuya, M., and Briscoe, J. (2018). What does time mean in development? *Development* **145**, dev164368.
- Forsberg, H., Crozet, F., and Brown, N.A. (1998). Waves of mouse *Lunatic fringe* expression, in four-hour cycles at two-hour intervals, precede somite boundary formation. *Curr. Biol.* **8**, 1027–1030.
- Gibb, S., Maroto, M., and Dale, J.K. (2010). The segmentation clock mechanism moves up a notch. *Trends Cell Biol.* **20**, 593–600.
- Gomez, C., Ozbudak, E.M., Wunderlich, J., Baumann, D., Lewis, J., and Pourquié, O. (2008). Control of segment number in vertebrate embryos. *Nature* **454**, 335–339.
- Harima, Y., Takashima, Y., Ueda, Y., Ohtsuka, T., and Kageyama, R. (2013). Accelerating the tempo of the segmentation clock by reducing the number of introns in the *Hes7* gene. *Cell Rep.* **3**, 1–7.
- Hicks, M., and Pyle, A. (2015). The Path from Pluripotency to Skeletal Muscle: Developmental Myogenesis Guides the Way. *Cell Stem Cell* **17**, 255–257.
- Hou, Z., Zhang, Y., Propson, N.E., Howden, S.E., Chu, L.F., Sontheimer, E.J., and Thomson, J.A. (2013). Efficient genome engineering in human pluripotent stem cells using Cas9 from *Neisseria meningitidis*. *Proc. Natl. Acad. Sci. USA* **110**, 15644–15649.
- Hou, Z., Jiang, P., Swanson, S.A., Elwell, A.L., Nguyen, B.K., Bolin, J.M., Stewart, R., and Thomson, J.A. (2015). A cost-effective RNA sequencing protocol for large-scale gene expression studies. *Sci. Rep.* **5**, 9570.
- Hubaud, A., and Pourquié, O. (2014). Signalling dynamics in vertebrate segmentation. *Nat. Rev. Mol. Cell Biol.* **15**, 709–721.
- Ichida, J.K., Blanchard, J., Lam, K., Son, E.Y., Chung, J.E., Egli, D., Loh, K.M., Carter, A.C., Di Giorgio, F.P., Koszka, K., et al. (2009). A small-molecule inhibitor of TGF- $\beta$  signaling replaces *sox2* in reprogramming by inducing *nanog*. *Cell Stem Cell* **5**, 491–503.
- Inman, G.J., Nicolás, F.J., Callahan, J.F., Harling, J.D., Gaster, L.M., Reith, A.D., Laping, N.J., and Hill, C.S. (2002). SB-431542 is a potent and specific inhibitor of transforming growth factor- $\beta$  superfamily type I activin receptor-like kinase (ALK) receptors ALK4, ALK5, and ALK7. *Mol. Pharmacol.* **62**, 65–74.
- Jiang, Y.J., Aerne, B.L., Smithers, L., Haddon, C., Ish-Horowicz, D., and Lewis, J. (2000). Notch signalling and the synchronization of the somite segmentation clock. *Nature* **408**, 475–479.
- Jouve, C., Palmeirim, I., Henrique, D., Beckers, J., Gossler, A., Ish-Horowicz, D., and Pourquié, O. (2000). Notch signalling is required for cyclic expression of the hairy-like gene *HES1* in the presomitic mesoderm. *Development* **127**, 1421–1429.
- Kim, S.I., Oceguera-Yanez, F., Sakurai, C., Nakagawa, M., Yamanaka, S., and Woltjen, K. (2016). Inducible Transgene Expression in Human iPS Cells Using Versatile All-in-One piggyBac Transposons. *Methods Mol. Biol.* **1357**, 111–131.
- Koh, P.W., Sinha, R., Barkal, A.A., Morganti, R.M., Chen, A., Weissman, I.L., Ang, L.T., Kundaje, A., and Loh, K.M. (2016). An atlas of transcriptional, chromatin accessibility, and surface marker changes in human mesoderm development. *Sci. Data* **3**, 160109.
- Krol, A.J., Roellig, D., Dequéant, M.L., Tassy, O., Glynn, E., Hattem, G., Mushegian, A., Oates, A.C., and Pourquié, O. (2011). Evolutionary plasticity of segmentation clock networks. *Development* **138**, 2783–2792.
- Kuleshov, M.V., Jones, M.R., Rouillard, A.D., Fernandez, N.F., Duan, Q., Wang, Z., Koplev, S., Jenkins, S.L., Jagodnik, K.M., Lachmann, A., et al. (2016). Enrichr: a comprehensive gene set enrichment analysis web server 2016 update. *Nucleic Acids Res.* **44** (W1), W90–W97.
- Langmead, B., Trapnell, C., Pop, M., and Salzberg, S.L. (2009). Ultrafast and memory-efficient alignment of short DNA sequences to the human genome. *Genome Biol.* **10**, R25.
- Laping, N.J., Grygielko, E., Mathur, A., Butter, S., Bomberger, J., Tweed, C., Martin, W., Fornwald, J., Lehr, R., Harling, J., et al. (2002). Inhibition of transforming growth factor (TGF)- $\beta$ 1-induced extracellular matrix with a novel inhibitor of the TGF- $\beta$  type I receptor kinase activity: SB-431542. *Mol. Pharmacol.* **62**, 58–64.
- Leimeister, C., Dale, K., Fischer, A., Klamt, B., Hrabe de Angelis, M., Radtke, F., McGrew, M.J., Pourquié, O., and Gessler, M. (2000). Oscillating expression of *c-Hey2* in the presomitic mesoderm suggests that the segmentation clock may use combinatorial signaling through multiple interacting bHLH factors. *Dev. Biol.* **227**, 91–103.
- Leng, N., Dawson, J.A., Thomson, J.A., Ruotti, V., Rissman, A.I., Smits, B.M., Haag, J.D., Gould, M.N., Stewart, R.M., and Kendziorski, C. (2013). EBSeg: an empirical Bayes hierarchical model for inference in RNA-seq experiments. *Bioinformatics* **29**, 1035–1043.
- Lewis, J., Hanisch, A., and Holder, M. (2009). Notch signaling, the segmentation clock, and the patterning of vertebrate somites. *J. Biol.* **8**, 44.
- Li, B., and Dewey, C.N. (2011). RSEM: accurate transcript quantification from RNA-Seq data with or without a reference genome. *BMC Bioinformatics* **12**, 323.
- Liang, X., Potter, J., Kumar, S., Zou, Y., Quintanilla, R., Sridharan, M., Carte, J., Chen, W., Roark, N., Ranganathan, S., et al. (2015). Rapid and highly efficient mammalian cell engineering via Cas9 protein transfection. *J. Biotechnol.* **208**, 44–53.
- Liang, X., Potter, J., Kumar, S., Ravinder, N., and Chesnut, J.D. (2017). Enhanced CRISPR/Cas9-mediated precise genome editing by improved design and delivery of gRNA, Cas9 nuclease, and donor DNA. *J. Biotechnol.* **247**, 136–146.
- Loh, K.M., Chen, A., Koh, P.W., Deng, T.Z., Sinha, R., Tsai, J.M., Barkal, A.A., Shen, K.Y., Jain, R., Morganti, R.M., et al. (2016). Mapping the Pairwise

- Choices Leading from Pluripotency to Human Bone, Heart, and Other Mesoderm Cell Types. *Cell* 166, 451–467.
- Mali, P., Yang, L., Esvelt, K.M., Aach, J., Guell, M., DiCarlo, J.E., Norville, J.E., and Church, G.M. (2013). RNA-guided human genome engineering via Cas9. *Science* 339, 823–826.
- Masamizu, Y., Ohtsuka, T., Takashima, Y., Nagahara, H., Takenaka, Y., Yoshikawa, K., Okamura, H., and Kageyama, R. (2006). Real-time imaging of the somite segmentation clock: revelation of unstable oscillators in the individual presomitic mesoderm cells. *Proc. Natl. Acad. Sci. USA* 103, 1313–1318.
- Mastromina, I., Verrier, L., Silva, J.C., Storey, K.G., and Dale, J.K. (2018). Myc activity is required for maintenance of the neuromesodermal progenitor signaling network and for segmentation clock gene oscillations in mouse. *Development* 145, dev161091.
- Matsumiya, M., Tomita, T., Yoshioka-Kobayashi, K., Isomura, A., and Kageyama, R. (2018). ES cell-derived presomitic mesoderm-like tissues for analysis of synchronized oscillations in the segmentation clock. *Development* 145, dev156836.
- Müller, F., and O’Rahilly, R. (1986). Somitic-vertebral correlation and vertebral levels in the human embryo. *Am. J. Anat.* 177, 3–19.
- Naiche, L.A., Holder, N., and Lewandoski, M. (2011). FGF4 and FGF8 comprise the wavefront activity that controls somitogenesis. *Proc. Natl. Acad. Sci. USA* 108, 4018–4023.
- Nakajima, T., Shibata, M., Nishio, M., Nagata, S., Alev, C., Sakurai, H., Toguchida, J., and Ikeya, M. (2018). Modeling human somite development and fibrodysplasia ossificans progressiva with induced pluripotent stem cells. *Development* 145, dev165431.
- Nestorowa, S., Hamey, F.K., Pijuan Sala, B., Diamanti, E., Shepherd, M., Laurenti, E., Wilson, N.K., Kent, D.G., and Göttgens, B. (2016). A single-cell resolution map of mouse hematopoietic stem and progenitor cell differentiation. *Blood* 128, e20–e31.
- Niwa, Y., Masamizu, Y., Liu, T., Nakayama, R., Deng, C.X., and Kageyama, R. (2007). The initiation and propagation of Hes7 oscillation are cooperatively regulated by Fgf and notch signaling in the somite segmentation clock. *Dev. Cell* 13, 298–304.
- Oates, A.C., Morelli, L.G., and Ares, S. (2012). Patterning embryos with oscillations: structure, function and dynamics of the vertebrate segmentation clock. *Development* 139, 625–639.
- Palmeirim, I., Henrique, D., Ish-Horowicz, D., and Pourquié, O. (1997). Avian hairy gene expression identifies a molecular clock linked to vertebrate segmentation and somitogenesis. *Cell* 91, 639–648.
- Richardson, C.D., Ray, G.J., DeWitt, M.A., Curie, G.L., and Corn, J.E. (2016). Enhancing homology-directed genome editing by catalytically active and inactive CRISPR-Cas9 using asymmetric donor DNA. *Nat. Biotechnol.* 34, 339–344.
- Russell, R.P., Fu, Y., Liu, Y., and Maye, P. (2018). Inverse agonism of retinoic acid receptors directs epiblast cells into the paraxial mesoderm lineage. *Stem Cell Res. (Amst.)* 30, 85–95.
- Schindelin, J., Arganda-Carreras, I., Frise, E., Kaynig, V., Longair, M., Pietzsch, T., Preibisch, S., Rueden, C., Saalfeld, S., Schmid, B., et al. (2012). Fiji: an open-source platform for biological-image analysis. *Nat. Methods* 9, 676–682.
- Soneson, C., and Robinson, M.D. (2018). Bias, robustness and scalability in single-cell differential expression analysis. *Nat. Methods* 15, 255–261.
- Sonnen, K.F., Lauschke, V.M., Uraji, J., Falk, H.J., Petersen, Y., Funk, M.C., Beaupeux, M., Francois, P., Merten, C.A., and Aulehla, A. (2018). Modulation of Phase Shift between Wnt and Notch Signaling Oscillations Controls Mesoderm Segmentation. *Cell* 172, 1079–1090.e12.
- Sparrow, D.B., Chapman, G., Wouters, M.A., Whittock, N.V., Ellard, S., Fatkin, D., Turnpenny, P.D., Kusumi, K., Sillence, D., and Dunwoodie, S.L. (2006). Mutation of the LUNATIC FRINGE gene in humans causes spondylocostal dysostosis with a severe vertebral phenotype. *Am. J. Hum. Genet.* 78, 28–37.
- Sparrow, D.B., Chapman, G., Turnpenny, P.D., and Dunwoodie, S.L. (2007). Disruption of the somitic molecular clock causes abnormal vertebral segmentation. *Birth Defects Res. C Embryo Today* 81, 93–110.
- Sparrow, D.B., Guillén-Navarro, E., Fatkin, D., and Dunwoodie, S.L. (2008). Mutation of Hairy-and-Enhancer-of-Split-7 in humans causes spondylocostal dysostosis. *Hum. Mol. Genet.* 17, 3761–3766.
- Sparrow, D.B., Sillence, D., Wouters, M.A., Turnpenny, P.D., and Dunwoodie, S.L. (2010). Two novel missense mutations in HAIRY-AND-ENHANCER-OF-SPLIT-7 in a family with spondylocostal dysostosis. *Eur. J. Hum. Genet.* 18, 674–679.
- Sparrow, D.B., Chapman, G., Smith, A.J., Mattar, M.Z., Major, J.A., O’Reilly, V.C., Saga, Y., Zackai, E.H., Dormans, J.P., Alman, B.A., et al. (2012). A mechanism for gene-environment interaction in the etiology of congenital scoliosis. *Cell* 149, 295–306.
- Sparrow, D.B., Faqeih, E.A., Sallout, B., Alswaid, A., Ababneh, F., Al-Sayed, M., Rukban, H., Eyaid, W.M., Kageyama, R., Ellard, S., et al. (2013). Mutation of HES7 in a large extended family with spondylocostal dysostosis and dextrocardia with situs inversus. *Am. J. Med. Genet. A.* 161A, 2244–2249.
- Takashima, Y., Ohtsuka, T., González, A., Miyachi, H., and Kageyama, R. (2011). Intronic delay is essential for oscillatory expression in the segmentation clock. *Proc. Natl. Acad. Sci. USA* 108, 3300–3305.
- Tam, P.P. (1981). The control of somitogenesis in mouse embryos. *J. Embryol. Exp. Morphol.* 65, 103–128.
- Tojo, M., Hamashima, Y., Hanyu, A., Kajimoto, T., Saitoh, M., Miyazono, K., Node, M., and Imamura, T. (2005). The ALK-5 inhibitor A-83-01 inhibits Smad signaling and epithelial-to-mesenchymal transition by transforming growth factor-beta. *Cancer Sci.* 96, 791–800.
- Vermillion, K.L., Bacher, R., Tannenbaum, A.P., Swanson, S., Jiang, P., Chu, L.F., Stewart, R., Thomson, J.A., and Vereide, D.T. (2018). Spatial patterns of gene expression are unveiled in the chick primitive streak by ordering single-cell transcriptomes. *Dev. Biol.* 439, 30–41.
- Warmflash, A., Sorre, B., Etoc, F., Siggia, E.D., and Brivanlou, A.H. (2014). A method to recapitulate early embryonic spatial patterning in human embryonic stem cells. *Nat. Methods* 11, 847–854.
- Whittock, N.V., Sparrow, D.B., Wouters, M.A., Sillence, D., Ellard, S., Dunwoodie, S.L., and Turnpenny, P.D. (2004). Mutated MESP2 causes spondylocostal dysostosis in humans. *Am. J. Hum. Genet.* 74, 1249–1254.
- Xi, H., Fujiwara, W., Gonzalez, K., Jan, M., Liebscher, S., Van Handel, B., Schenke-Layland, K., and Pyle, A.D. (2017). In Vivo Human Somitogenesis Guides Somite Development from hPSCs. *Cell Rep.* 18, 1573–1585.
- Yang, L., Guell, M., Byrne, S., Yang, J.L., De Los Angeles, A., Mali, P., Aach, J., Kim-Kiselak, C., Briggs, A.W., Rios, X., et al. (2013). Optimization of scarless human stem cell genome editing. *Nucleic Acids Res.* 41, 9049–9061.
- Zhang, J., Chu, L.F., Hou, Z., Schwartz, M.P., Hacker, T., Vickerman, V., Swanson, S., Leng, N., Nguyen, B.K., Elwell, A., et al. (2017). Functional characterization of human pluripotent stem cell-derived arterial endothelial cells. *Proc. Natl. Acad. Sci. USA* 114, E6072–E6078.

## STAR★METHODS

### KEY RESOURCES TABLE

| REAGENT or RESOURCE                                                              | SOURCE                   | IDENTIFIER                   |
|----------------------------------------------------------------------------------|--------------------------|------------------------------|
| <b>Antibodies</b>                                                                |                          |                              |
| Anti-POU5F1                                                                      | Santa Cruz               | Sc-5279; RRID: AB_628051     |
| Anti-T (Brachyury) (APC-conjugated)                                              | R&D Systems              | IC2085A; RRID: AB_2271455    |
| Anti-TBX6                                                                        | R&D Systems              | AF4744; RRID: AB_2200834     |
| Anti-MEOX1                                                                       | Atlas Antibodies         | HPA045214; RRID: AB_10959299 |
| Chicken anti-Mouse IgG (H+L) Cross-Adsorbed Secondary Antibody, Alexa Fluor 594  | Thermo Fisher Scientific | A-21201; RRID: AB_2535787    |
| Donkey anti-Goat IgG (H+L) Cross-Adsorbed Secondary Antibody, Alexa Fluor 350    | Thermo Fisher Scientific | A-21081; RRID: AB_2535738    |
| Chicken anti-Rabbit IgG (H+L) Cross-Adsorbed Secondary Antibody, Alexa Fluor 488 | Thermo Fisher Scientific | A-21441; RRID: AB_2535859    |
| <b>Chemicals, Peptides, and Recombinant Proteins</b>                             |                          |                              |
| CHIR 99021                                                                       | Tocris                   | 4423                         |
| A 83-01                                                                          | Tocris                   | 2939                         |
| DAPT                                                                             | Tocris                   | 2634                         |
| endo-IWR1                                                                        | Tocris                   | 3532                         |
| XAV 939                                                                          | Tocris                   | 3748                         |
| (+)-JQ1                                                                          | Tocris                   | 4499                         |
| 10058-F4                                                                         | Tocris                   | 4406                         |
| Y-27632 dihydrochloride                                                          | Tocris                   | 1254                         |
| RepSox                                                                           | Tocris                   | 3742                         |
| SB 431542                                                                        | Tocris                   | 1614                         |
| Recombinant Human Noggin Protein                                                 | R&D Systems              | 6057-NG-01M/CF               |
| Recombinant Human TGF-beta 1 Protein, CF                                         | R&D Systems              | 240-B/CF                     |
| Human Holo-Transferrin Protein, CF                                               | R&D Systems              | 2914-HT                      |
| Porcn Inhibitor II, C59                                                          | Sigma-Aldrich            | 5004960001                   |
| Insulin solution human                                                           | Sigma-Aldrich            | I9278                        |
| Doxycycline hyclate                                                              | Sigma-Aldrich            | D9891                        |
| BD Matrigel Matrix Growth Factor Reduced                                         | BD Biosciences           | 354230                       |
| UltraPure 0.5M EDTA, pH 8.0                                                      | Thermo Fisher Scientific | 15575020                     |
| Dulbecco's phosphate-buffered saline (DPBS)                                      | Thermo Fisher Scientific | 14190250                     |
| DMEM/F-12                                                                        | Thermo Fisher Scientific | 11320082                     |
| StemPro Accutase Cell Dissociation Reagent                                       | Thermo Fisher Scientific | A1110501                     |
| TrueCut Cas9 Protein v2                                                          | Thermo Fisher Scientific | A36497                       |
| <b>Critical Commercial Assays</b>                                                |                          |                              |
| GeneArt Precision gRNA Synthesis Kit                                             | Thermo Fisher Scientific | A29377                       |
| GeneArt Genomic Cleavage Detection Kit                                           | Thermo Fisher Scientific | A24372                       |
| POU5F1 TaqMan Assay (4331182)                                                    | Thermo Fisher Scientific | Hs00999634_gH                |
| TBX6 TaqMan Assay (4331182)                                                      | Thermo Fisher Scientific | Hs00365539_m1                |
| HES7 TaqMan Assay (4331182)                                                      | Thermo Fisher Scientific | Hs03988571_m1                |
| LFNG TaqMan Assay (4331182)                                                      | Thermo Fisher Scientific | Hs00385436_g1                |
| DLL1 TaqMan Assay (4331182)                                                      | Thermo Fisher Scientific | Hs00194509_m1                |
| MEOX1 TaqMan Assay (4331182)                                                     | Thermo Fisher Scientific | Hs00244943_m1                |
| FOXC2 TaqMan Assay (4331182)                                                     | Thermo Fisher Scientific | Hs00270951_s1                |

(Continued on next page)

| <b>Continued</b>                                                       |                                     |                                                                                                   |
|------------------------------------------------------------------------|-------------------------------------|---------------------------------------------------------------------------------------------------|
| REAGENT or RESOURCE                                                    | SOURCE                              | IDENTIFIER                                                                                        |
| MSGN1 TaqMan Assay(4331182)                                            | Thermo Fisher Scientific            | Hs03405514_s1                                                                                     |
| GAPDH TaqMan Assay (VIC_PL, 4448486)                                   | Thermo Fisher Scientific            | Hs02786624_g1                                                                                     |
| Nano-Glo(R) Live Cell EX-6829                                          | Promega                             | CS2025A03                                                                                         |
| Deposited Data                                                         |                                     |                                                                                                   |
| Raw RNA-seq data                                                       | This paper                          | GEO: GSE128469                                                                                    |
| Experimental Models: Cell Lines                                        |                                     |                                                                                                   |
| Human: WA01 (H1) hESC line (NIH approval number NIHhESC-10-0043)       | WiCell                              | WA01: H1 Human ES                                                                                 |
| Oligonucleotides                                                       |                                     |                                                                                                   |
| HES7 knockin junction PCR, in <a href="#">Table S2</a>                 | This paper                          | Synthesized from IDT                                                                              |
| HES7 for Southern blotting probe template, in <a href="#">Table S2</a> | This paper                          | Synthesized from IDT                                                                              |
| Primers for make HES7-C73T-gRNA template, in <a href="#">Table S2</a>  | This paper                          | Synthesized from IDT                                                                              |
| Oligo for HES7-C73T-ssODN donor, in <a href="#">Table S2</a>           | This paper                          | Synthesized from IDT                                                                              |
| Primers for sequencing HES7 Exon2, in <a href="#">Table S2</a>         | This paper                          | Synthesized from IDT                                                                              |
| Recombinant DNA                                                        |                                     |                                                                                                   |
| HES7-NLuc-2A-tdTomato knockin vector                                   | This paper                          | Addgene, 130932                                                                                   |
| pCRII-Blunt-U6-HES7-STOP-gRNA                                          | This paper                          | Addgene, 130933                                                                                   |
| pB-TAG-NICD                                                            | This paper                          | Addgene, 130934                                                                                   |
| pB-TAG-HES7                                                            | This paper                          | Addgene, 130935                                                                                   |
| pB-EF1a-NLuc                                                           | This paper                          | Addgene, 130936                                                                                   |
| NanoLuc gene cassette                                                  | Promega                             | GeneBank: JQ437370                                                                                |
| Software and Algorithms                                                |                                     |                                                                                                   |
| Bandpass and detrending Perl code                                      | This paper                          | <a href="https://github.com/stewart-lab/Detrending">https://github.com/stewart-lab/Detrending</a> |
| Wave-Crest                                                             | <a href="#">Chu et al., 2016</a>    | <a href="https://github.com/lengning/WaveCrest">https://github.com/lengning/WaveCrest</a>         |
| Trendy                                                                 | <a href="#">Bacher et al., 2018</a> | <a href="https://rbacher.shinyapps.io/trendy/">https://rbacher.shinyapps.io/trendy/</a>           |
| Enrichr                                                                | <a href="#">Chen et al., 2013</a>   | <a href="http://amp.pharm.mssm.edu/Enrichr/">http://amp.pharm.mssm.edu/Enrichr/</a>               |
| Other                                                                  |                                     |                                                                                                   |
| scRNA-seq data for somitomere cells                                    | <a href="#">Loh et al., 2016</a>    | <a href="http://imlspeniction.uzh.ch:3838/conquer/">http://imlspeniction.uzh.ch:3838/conquer/</a> |

## LEAD CONTACT AND MATERIALS AVAILABILITY

Further information and requests for resources and reagents should be directed to and will be fulfilled by the Lead Contact, James A. Thomson ([JThomson@morgridge.org](mailto:JThomson@morgridge.org)). Plasmids generated in this study have been deposited to Addgene, 130932-130936.

## EXPERIMENT MODEL AND SUBJECT DETAILS

The experimental procedures for H1 human embryonic stem cells (ESCs) described in this study were approved by the ethics committee with IRB Approval Number: SC-2015-0010. The H1 human ESCs are registered in the NIH Human Embryonic Stem Cell Registry with the Approval Number: NIH hESC-10-0043 ([https://grants.nih.gov/stem\\_cells/registry/current.htm?id=29](https://grants.nih.gov/stem_cells/registry/current.htm?id=29)).

## METHOD DETAILS

### Human ESCs Maintenance and Differentiation

H1 human embryonic stem cells (ESCs) were routinely maintained in E8 medium prepared in-house ([Chen et al., 2011](#)); commercially available as Essential 8 Medium (Thermo Fisher Scientific Cat. No. A1517001) on Matrigel (0.5  $\mu$ g/6-well plate, BD Bioscience) coated tissue culture plates with daily medium feeding. Cells were passaged every 2 to 3 days with 0.5 mM EDTA in phosphate buffered saline (PBS) at 1:6 to 1:12 ratio for maintenance. Differentiation was performed similarly to previously established protocols ([Chu et al., 2016](#); [Zhang et al., 2017](#); [Hou et al., 2015](#); [Loh et al., 2016](#)). In brief, H1 cells were individualized with Accutase (Thermo Fisher Scientific, Cat. No. A1110501), washed once, and then seeded onto Matrigel-coated plates at a density of  $1.0\text{--}2.0 \times 10^4$  cells/cm<sup>2</sup> and cultured in various types of differentiation medium supplemented with ROCK inhibitor Y-27632 (10  $\mu$ M) overnight. For mesendoderm and PSM differentiation, individualized H1 cells were first seeded in E8 supplemented with Activin A (R&D Systems, 100 ng/mL) and CHIR99021 (3  $\mu$ M) for the first 24 h, then switched to the PSM medium: E6 base medium (E8 medium minus FGF2, minus TGF $\beta$ 1) supplemented

with A83-01 (2  $\mu$ M), CHIR99021 (3  $\mu$ M), FGF2 (100 ng/mL), and NOGGIN (100 ng/mL) for another 24 h. The cells were then switched to somite medium: E6 base medium supplemented with PD0325901 (1  $\mu$ M), IWR1 (2.5  $\mu$ M), A83-01 (2  $\mu$ M), and NOGGIN (100 ng/mL). Additional small molecules were used to test their impact on *HES7* oscillation in the PSM state: XAV939 (10  $\mu$ M), (+)-JQ-1 (10  $\mu$ M), 10058-F4 (10  $\mu$ M), RepSox (25  $\mu$ M), and SB (10  $\mu$ M). All small molecule inhibitors and reagents are listed in the [Key Resources Table](#). All the cell cultures used in our laboratory are routinely tested as negative for mycoplasma contamination.

### Gene Targeting and Construction of the *HES7-NanoLuc-2A-tdTomato* Reporter Cell Line

*HES7-NanoLuc-2A-tdTomato* donor vector with  $\sim$ 880 bp homology arms on each side of the stop codon was synthesized and cloned into a gene targeting vector backbone. CRISPR-Cas9 mediated gene targeting experiments were performed as previously described ([Hou et al., 2015](#); [Chu et al., 2016](#); [Zhang et al., 2017](#)). Briefly, H1 cells were individualized with Accutase, washed once with E8 medium, and resuspended in E8 medium supplemented with 10 mM HEPES buffer (Thermo Fisher Scientific, Cat. No. 15630080) and Y-27632 (10  $\mu$ M). For electroporation,  $2.5 \times 10^6$  cells were mixed with 7.5  $\mu$ g of pCMV-hCas9 plasmid, 7.5  $\mu$ g of gRNA construct, and 15  $\mu$ g of donor DNA template in a total of 500  $\mu$ L of cell/DNA suspension, transferred to a 4-mm cuvette (Bio-Rad, Cat. No. 1652008) and electroporated with a Gene Pulser Xcell Electroporation Systems (Bio-Rad, Cat. No. 1652660). Electroporation parameters used were 250 V, 500  $\mu$ F, and infinite resistance. Cells were then plated into Matrigel-coated culture dishes in E8 medium supplied with Y-27632 (10  $\mu$ M) overnight. Fresh medium was changed daily. Geneticin selection (Thermo Fisher Scientific, Cat. No. 10131027, 100  $\mu$ g/mL) was started three days after electroporation. Geneticin-resistant colonies were picked 10 to 12 days later. Correct targeted clones were first identified by junction PCR and confirmed by Southern blot analysis. In the *HES7-NLuc-2A-tdtomato* targeting experiments, clone 10 was verified as a correctly targeted clone with normal karyotype and is used for all the subsequent experiments in this study. All DNA oligos were synthesized from Integrated DNA Technologies (IDT). Oligo sequences are listed in [Table S2](#). The pCMV-hCas9 plasmid was a gift from George Church (Addgene plasmid # 41815) ([Mali et al., 2013](#)). All plasmids reported in this study and their sequences are available upon request.

### PiggyBac Transposon to Generate Inducible Transgenic Reporter Cell Lines

Human gene open reading frame (ORF) cDNA clones were ordered from GeneCopoeia or GenScript. Entry vectors containing specific cDNA clones were subcloned to an all-in-one piggyBac destination vector (PB-TAG-ERP2) by using Gateway LR Clonase II Enzyme mix (Thermo Fisher Scientific, Cat. No. 11791020). PiggyBac constructs were electroporated into the *H1-HES7-NLuc-2A-tdTomato* reporter cell line. For electroporation,  $2.5 \times 10^6$  cells were mixed with 1.5  $\mu$ g of pCMV-hyPBBase plasmid, 20.0  $\mu$ g of PB-TAG-ERP2 piggyBac construct in a total of 500  $\mu$ L of cell/DNA suspension, with the identical electroporation parameters listed previously. Cells were then plated at clonal density in E8 medium supplied with Y-27632 (10  $\mu$ M) overnight. Fresh medium was changed daily. Puromycin (Thermo Fisher Scientific, Cat. No. A1113803) selection (1.0  $\mu$ g/mL) was started two days after electroporation. Single Puromycin-resistant colonies were picked, expanded, and then tested for the efficiency of DOX induction (2000 ng/mL) based on percentages of GFP-positive expression and confirmed by qPCR analysis of the transgene expression. Only clones that reached >95% purity after DOX induction were used for further experiments. The PB-TAG-ERP2 was a gift from Knut Woltjen (Addgene plasmid # 804790) ([Kim et al., 2016](#)). All the piggyBac vectors and their sequences are available upon request.

### Genome Editing for Point Mutation by HDR in *HES7* Reporter Cell Line

A point mutation was introduced into human ESCs via homology-directed repair (HDR) triggered by CRISPR-Cas9 complexed with single-guide RNA (gRNA) as ribonucleoproteins (RNPs) along with single-stranded oligonucleotide donors (ssODNs) harboring the desired mutation as described previously ([Liang et al., 2015, 2017](#)). Specifically, assembled RNP and ssODNs (1  $\mu$ M) were mixed with  $1.0 \times 10^5$  parental *HES7* reporter cells per electroporation using the Neon Transfection System 10  $\mu$ L Kit, program #16 (pulse voltage: 1400, pulse width: 20, pulse no.: 2) (Thermo Fisher Scientific). Electroporated cells were then seeded at clonal density (500–1500 cells per 10 cm tissue culture dish) with E8 plus Y-27632 (10  $\mu$ M) for the first three days. Single colonies were then picked 7 to 10 days post electroporation into 96-well plates for further expansion. Picked colonies were lysed, and the genomic region of *HES7* exon 2 were PCR amplified and analyzed by Sanger sequencing performed at the University of Wisconsin Biotechnology Center DNA Sequencing Facility. Identified heterozygous and homozygous mutated 73C-T clones were then selected for expansion and oscillation measurements. All DNA oligos and ssODN donors were ordered from IDT, and full sequences are available in [Table S2](#).

### Live Cell Detection of NanoLuc Luminescence Activity and Quantification

Cells were seeded on Matrigel (BD Bioscience) coated 96-well optical plates (Thermo Fisher Scientific, Cat. No. 165306) for initiation of differentiation ( $2.4 \times 10^4$  cells/cm<sup>2</sup>). Standard *HES7* oscillation detection experiments were performed on day 3 differentiated PSM cells ( $\sim$ 72 hours post differentiation). For experiments described in [Figures 3B and S3D](#), a density of  $1.6 \times 10^5$  cells/cm<sup>2</sup> were used. Prior to luminescence detection, fresh PSM medium supplemented with NanoLuc substrate Nano-Glo<sup>®</sup> Live Cell EX-6829 (1000X, Promega, Cat. No. CS2025A03) and small molecules and/or DOX were applied. Cells were allowed to equilibrate for at least 30 min in a regular incubator. The optical plate was then transferred to a GloMax Explorer Luminometer/Fluorometer Instrument (Promega, Cat. No. GM3510) set at 37°C and placed inside an environmental controlled incubator (Thermo Fisher Scientific, Cat. No. 3310) maintained at 5% CO<sub>2</sub> during luminescence detection. All experiments reported in this study used the default parameter for 96-well Lid-ON setting, integration time 5 s, and each well is recorded with an interval of 5 min with continuous looping for at least 24 and up to 38 h.

### Live Cell Imaging of NanoLuc Luminescence Activity and Quantification

Cells were seeded on a Matrigel-coated 35 mm glass-bottomed dish (MatTek, Cat. No. P35G-1.5-14-C) at  $2.5 \times 10^5$  to  $5.0 \times 10^5$  cells per dish to induce differentiation as previously described. All the *HES7* luminescence imaging detection experiments were performed with PSM medium supplemented with NanoLuc substrate Nano-Glo® Live Cell EX-6829 (1000X, Promega, CS2025A03). After applying the substrate containing medium, cells were equilibrated for at least 30 min in a regular incubator before being transferred to an environment-controlled long-term bioluminescence imager (Olympus LV200). All the images were captured at 5-min intervals for 16 to 36 h with bright field and luminescence channels. [Video S2](#) was processed by MetaMorph software 7.4 (Olympus). Quantification was performed using Fiji ([Schindelin et al., 2012](#)). Raw luminescence intensity data were obtained by manually selecting regions of interests (ROIs) across a population of cells or single cells. For the quantification of a population of cells, 10 to 20 identical sized, square-shaped ROIs were randomly placed to capture luminescence intensity in the field of view. For the quantification of single cells, the shapes of ROIs were adjusted across all the frames to include the traveling path of a single cell while avoiding overlap with neighboring cells. Background ROIs were obtained for each of the time series by selecting regions without observable luminescence activity, usually in the corners of the images. Raw luminescence data were then detrended and processed the same manner as described for data obtained with the plate reader.

### RNA-Seq Library Preparation, Reads Processing, and Normalization

Cells grown in 6-well or 12-well cell culture plates were directly lysed with RLT Plus lysis buffer (QIAGEN) and stored in  $-80^\circ\text{C}$  for later processing. Total RNA was purified from the RLT Plus lysates using the RNeasy Plus Micro Kit (QIAGEN) according to the manufacturer's instructions. To construct the RNA-seq library, total RNA from each batch of samples (using an input of  $\sim 100$  ng total RNA) were used following the LM-seq protocol ([Hou et al., 2015](#)). The reads generated from the Illumina HiSeq 3000 (69 cycles of insert read and 10 cycles of index read) were processed with CASAVA-1.8.2 basecalling software (Illumina). Reads were mapped via Bowtie ([Langmead et al., 2009](#)) against the hg19 RefSeq reference, and gene expression estimates were obtained as expected counts (ECs) and transcripts per million (TPM) via RSEM ([Li and Dewey, 2011](#)). A total of 58 bulk samples from two experiments were sequenced: (1) a daily time course of H1 human ESCs differentiating to the somite cell state, 12 samples collected as triplicates per time point and (2) differentiation from H1-derived PSM to the somite cell state, samples collected every 30 min in duplicates, 46 samples. All the gene expression expected counts (ECs) were first normalized by median-by-ratio normalization as indicated in the EBSeq package before downstream analysis ([Leng et al., 2013](#)). All the RNA-seq data reported in this study is available through GEO: GSE128469.

### Immunofluorescence Staining and Confocal Image Analysis

Cells were seeded and cultured on Matrigel-coated glass-bottom culture dishes (MatTek, 12- or 24-well dishes) for differentiation. Cultured cells were then washed with PBS once then fixed with BD Cytofix at  $4^\circ\text{C}$  for 15 min. Cells were then permeabilized with 0.2% Triton X-100 (in PBS) at room temperature for 30 min. Cells were then blocked with blocking buffer (2% BSA and 1% FBS in PBS) for 1 h at room temperature followed by staining with primary antibody diluted in blocking buffer at  $4^\circ\text{C}$  overnight. The next day, the cells were washed three times with the blocking buffer before being incubated with AlexaFluor secondary antibodies (Thermo Fisher Scientific, 1:1000 dilutions in blocking buffer) and DAPI or Hoechst 33342 (Sigma, Cat. No. B2261) for 1 h at room temperature. Cells were then washed three times with the blocking buffer and ready for imaging. All the primary antibodies used in this study can be found in the [Key Resources Table](#). Immunofluorescence images were collected using a Nikon A1R laser scanning confocal microscope with Plan Apo 10x, Plan Fluor 20x Ph1 DLL, or Plan Apo 20x DIC M objectives. Images were processed using NIS Elements or ImageJ. Z stacks are presented as maximum intensity projection images.

### Reverse Transcription (RT) and qPCR Analysis

RNA isolation, RT reactions, and real-time quantitative PCR analysis were performed essentially as described previously ([Chu et al., 2011, 2016](#)). Briefly, cells were lysed in 350  $\mu\text{L}$  of RLT plus buffer, and the total RNA were purified using RNeasy kits with either on-column DNase treatment or genomic DNA removal columns under the guidance of the user manual (QIAGEN). Between 100 ng to 500 ng of purified RNA were reverse transcribed with SuperScript IV VILO Master mix (Thermo Fisher Scientific, Cat. No. 11756050). To perform TaqMan qPCR reactions (10  $\mu\text{L}$  total volumes), 1  $\mu\text{L}$  of the diluted cDNA was subsequently used in each of the triplicate qPCR reactions with individual 1  $\times$  TaqMan Gene Expression assays and 1  $\times$  TaqMan Universal PCR Master Mix II (Thermo Fisher Scientific). The ViiA 7 System was used to perform qPCR, and ExpressionSuite was used to perform data analysis (all from Thermo Fisher Scientific). All TaqMan Gene Expression assays are from Thermo Fisher Scientific and are listed in the [Key Resources Table](#).

## QUANTIFICATION AND STATISTICAL ANALYSIS

### Oscillation Data Processing – Detrending of Raw Luminescence Data

Time course luminescence signals (obtained from GloMax plate reader or quantified images) were detrended using a bandpass filter implemented in Perl. For each sample, the raw data were first high-pass filtered by subtracting, at each time point, the mean value over a broadly localized window around that time point. These results were then low-pass filtered via Gaussian smoothing over a much smaller localized window. All samples were run using the same window sizes:  $\pm 45$  time points for the high-pass filter

and  $\pm 3$  time points for the low-pass filter. The detrended data were then imported to Prism for visualization. The code for detrending raw data as well as example inputs and outputs are available at Github (<https://github.com/stewart-lab>).

### Oscillation Data Analysis – Polynomial Fitting and Quantification of Oscillation Periodicity

The detrended luminescence data were fitted using polynomial regression to eliminate artifact noise and emphasize main peaks and valleys. We used the base function `lm` in R version 3.5.0 with polynomial degree equals to 20 by default. Based on raw data, 20 is large enough to illustrate the main patterns of all luminescence datasets while maintaining a reasonable computation complexity. The resolution of fitted data becomes per min instead of per 5 min, allowing for more accurate estimations. By determining the derivative and calculating roots, we calculated a lagged difference of fitted data to allow us to identify peaks and valleys. We identified peaks as “+ to –” sign changes (increasing to decreasing) and valleys as “– to +” sign changes (decreasing to increasing). The peak-to-peak time, valley-to-valley time, peak heights, and valley depths were then calculated. Since the luminescence data are usually noisier at the beginning and the end, we truncated the first 100 min and last 10% of data points during analysis. All luminescence data presented is scaled from minimum to maximum signals and shown as mean  $\pm$  SEM obtained from 4 to 5 replicates of samples in each experiment.

### Bulk High Temporal RNA-Seq Data Analysis – Principal Component Analysis, Pearson Correlation Analysis, and GO-Term Enrichment

Principal component analysis was performed using default principal component analysis in R, based on the top 500 variable genes across all the samples. Before Pearson correlation analysis, 5860 low-expressed genes whose maximum expressions among all time points were less than 10 nECs were filtered out. Downregulated genes (100 genes) were identified by the intersection of correlation  $\geq 0.8$  with the expression trend of *T* (326 genes), *MIXL1* (120 genes), and *MSGN1* (351 genes). Upregulated genes (162 genes) were identified by the intersection of correlation  $\geq 0.8$  with the expression trend of *MEOX1* (360 genes), *RIPPLY1* (267 genes), and *TCF15* (262 genes). To identify transitory genes, we focused on seven marker genes (*HES7*, *DLL1*, *NOTCH1*, *LFNG*, *AXIN2*, *SNAI2*, *HEYL*) based on their strong literature support for being involved in somitogenesis (Bessho et al., 2001b; Bone et al., 2014; Forsberg et al., 1998; Jouve et al., 2000; Dale et al., 2006; Aulehla et al., 2003; Leimeister et al., 2000) and displayed a strong transitory signature in our data (Figure 1C). In Figure S1C, gene expression values (in nECs) were first smoothed by the band-pass filter code mentioned above ( $\pm 1000$  time points for the high-pass filter and  $\pm 4$  time points for the low-pass filter). Smoothed data were processed with the following criteria: (1) the position of the peak was within the range of peaks of the seven marker genes; (2) the shape around the peak was within the seven marker genes, wherein shape is measured by the second derivative and estimated by the lagged difference of detrended curve; and (3) the variance of the lagged difference of the gene itself was smaller than those of seven marker genes (less noisy). A total of 415 transitory genes was identified based on the previous criteria. GO-term enrichment analysis was performed using Enrichr (<http://amp.pharm.mssm.edu/Enrichr/>) (Chen et al., 2013; Kuleshov et al., 2016). All of the downregulated, upregulated, and transitory gene lists, as well as Enrichr results, are in Table S1.

### Reanalysis of scRNA-Seq Data from Loh et al., 2016

scRNA-seq data were downloaded from the conquer repository (Soneson and Robinson, 2018) (<http://imlspenticton.uzh.ch:3838/conquer/>). Dataset#40, SRP073808 contains three types of cells collected during human ES differentiation (Koh et al., 2016; Loh et al., 2016). This dataset contains a total of 188 cells: DLL1-positive paraxial mesoderm (PXM, 56 cells); D2.25 somitomere (87 cells), and early somite (45 cells). Expression counts were normalized using SCnorm (Bacher et al., 2017) (v1.5.7) using the default parameters and specifying each cell's condition. To mitigate the effects of cell cycle heterogeneity in scRNA-seq data, we employed Seurat's (Butler et al., 2018) (v2.3.4) CellCycleScoring function to score canonical G2M and S phase cell cycle markers and regress out the differences between phases as an additional preprocessing step (Nestorowa et al., 2016). Normalized, preprocessed scRNA-seq data were then reordered by Wave-Crest (Chu et al., 2016) (v0.0.1) with the default setting of degree = 3, and using 12 key markers according to their expression progression over time: *FOXC2*, *LFNG*, *HEYL*, *HES7*, *HOPX*, *MEOX1*, *MIXL1*, *MSGN1*, *T*, *TBX6*, *TCF15*, and *RIPPLY1* (Figure S1D). To identify peak gene expression patterns in reordered single cells, we applied Trendy (v1.4.7), which characterizes piece-wise expression trends as up, down, or the same (Bacher et al., 2018). We used default parameters except we set `minNumInSeg` = 10 requiring a minimum of 10 cells for a valid trend and the significance threshold for a trend to be considered either up or down to `pvalCut` = .2. Peaked expression was defined as genes with an up trend followed by a down trend. Among the list of genes with a peak, we manually checked for somitogenesis genes and selected representative genes are shown in Figure S1E.

### Other Software

To generate figures and text, the following software packages were used: Microsoft Word, Excel, and PowerPoint for Mac v16.16.6; Adobe Illustrator CSS 2018 v22.1 and Photoshop CSS 2018 v19.1.2; Endnote X8.2; FlowJo 10.5.0; and Prism Graphpad 8.0.2.

### DATA AND CODE AVAILABILITY

The RNA-seq data reported in this paper have been deposited in the NCBI Gene Expression Omnibus and are accessible through accession number GEO: GSE128469.

**Cell Reports, Volume 28**

**Supplemental Information**

***An In Vitro* Human Segmentation Clock Model**

**Derived from Embryonic Stem Cells**

**Li-Fang Chu, Daniel Mamott, Zijian Ni, Rhonda Bacher, Cathy Liu, Scott Swanson, Christina Kendzierski, Ron Stewart, and James A. Thomson**



## Supplemental Information

### **An *in vitro* Human Segmentation Clock Model Derived from Embryonic Stem Cells**

Li-Fang Chu, Daniel Mamott, Zijian Ni, Rhonda Bacher, Cathy Liu, Scott Swanson, Christina Kendzierski, Ron Stewart and James A. Thomson

**Figure S1. Characterizations of differentiation to PSM and somite cell state, related to Figure 1**

**Figure S2. Detection and quantification of *HES7* oscillation, related to Figure 2**

**Figure S3. Characterizations of *HES7* oscillation and modeling SCDO4, related to Figure 3**

**Video S1. Time-lapse video of proliferating PSM cells, related to Figure 2**

**Video S2. Time-lapse video of luminescence imaging *HES7* reporter, related to Figure 2**

**Table S1. GO-term enrichment results from three gene groups, related to Figure 1**

**Table S2. DNA oligos used in this study, related to Figures 2 and 3**

**Figure S1**

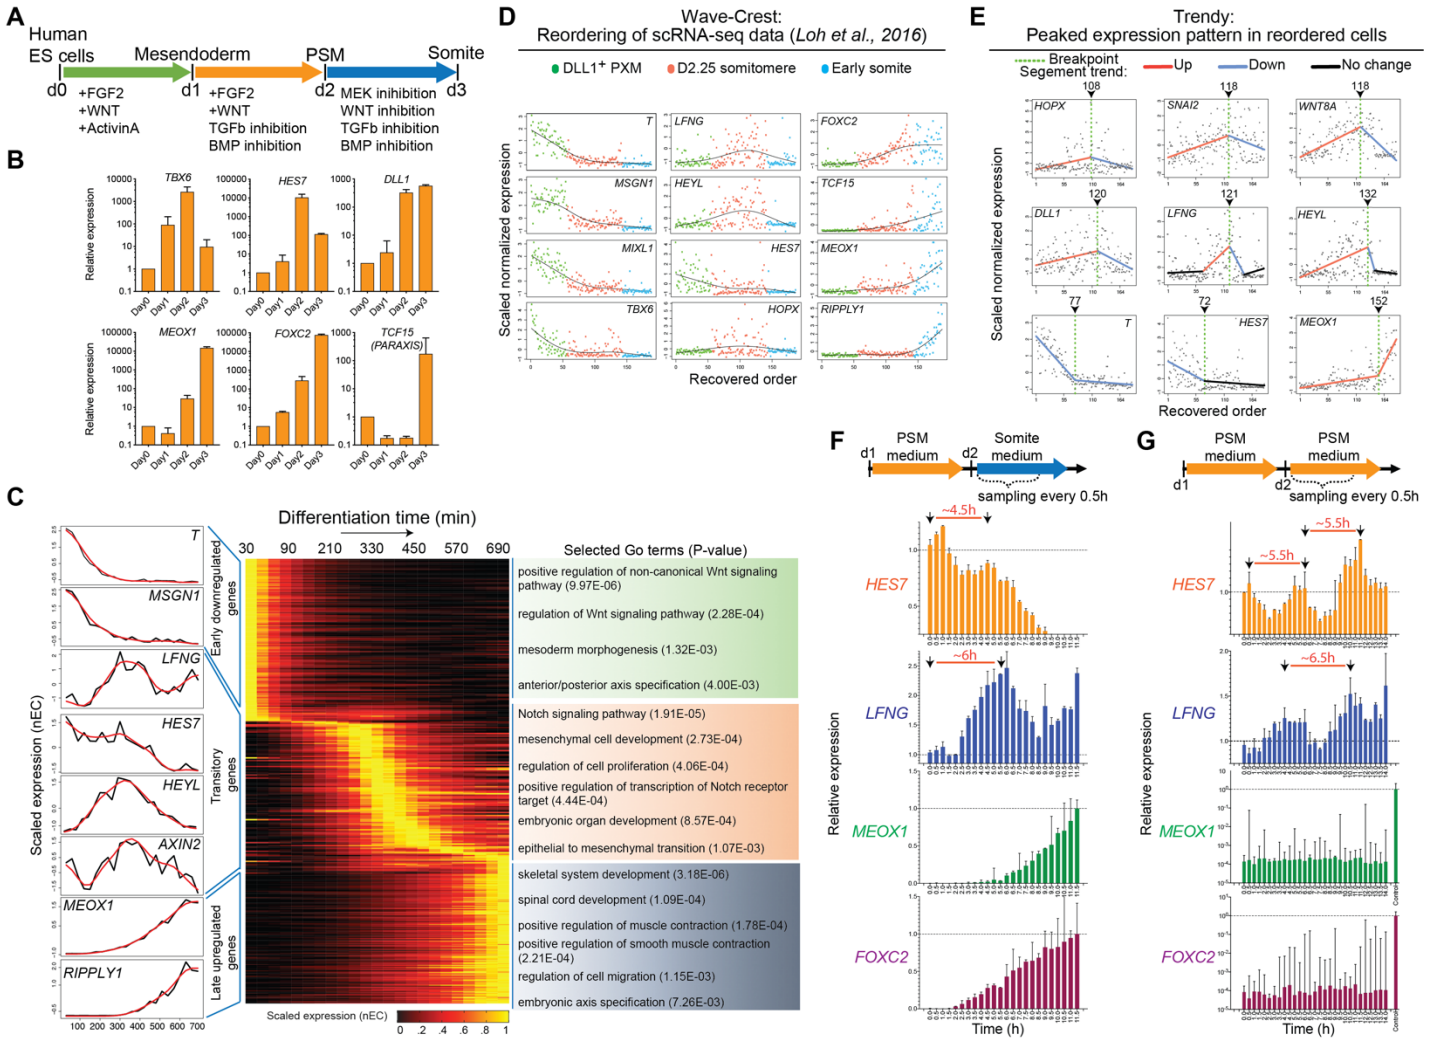

**Supplemental Figure 1, related to Figure 1. Human ES cell differentiation to PSM and somite cell states. (A)** Schematic of differentiation strategy, annotated with signaling pathway manipulations (see Methods). **(B)** qRT-PCR analysis of select markers representing ES, mesendoderm, PSM and somite state. All relative expression values were normalized to endogenous *GAPDH* expression than to Day0 samples. All data are presented as the mean  $\pm$  S.D. **(C)** Left and middle panels, representative genes and a heatmap of gene expression selected from temporal RNA-seq data, shown top 100 early downregulated genes, 120 transitory genes and 162 late upregulated genes. The x-axis indicates the differentiation time as samples were collected. Expression values (normalized expect count, nECs) from replicate samples were first averaged then scaled minimum to maximum expression per gene row and smoothed. Expression value scale is indicated as a horizontal bar. Right panel, enriched top GO terms from each category indicated (see Methods). **(D)** Temporal reordering of scRNA-seq data (from Loh et al., 2016) using Wave-crest with twelve marker

genes. The x-axis shows the reordered single cells. The y-axis shows scaled gene expression values, nECs. Each cell type is color annotated from the original study. **(E)** Examples of peak/breakpoint cells identified by Trendy with the selected markers. The number, arrows and green dashed lines indicate the number of peak/breakpoint cells identified by Trendy. The fitted trend is overlaid and color annotated: red, upward trend; blue, downward trend; black, flat trend. **(F)** Upper panel, schematic of RNA-seq profiling collecting samples every 30 minutes for 12 hours, immediately after switching to somite medium. Lower panel, RT-qPCR results of *HES7*, *LFNG*, *MEOX1* and *FOXC2*. All expression levels were first normalized to endogenous *GAPDH*, then to the first time point (*HES7*, *LFNG*) or the last time point (*MEOX1*, *FOXC2*). Arrows indicate estimated peak-to-peak duration. All data are presented as the mean  $\pm$  SD. **(G)** Upper panel, schematic of time course experiments collecting samples every 30 minutes for 14 hours, immediately after feeding cells with fresh PSM medium. Lower panel, RT-qPCR results of *HES7*, *LFNG*, *MEOX1* and *FOXC2*. All expression levels were first normalized to endogenous *GAPDH*, then to either the first time point (*HES7*, *LFNG*) or a control somite cell state sample (*MEOX1*, *FOXC2*). Because *MEOX1* and *FOXC2* are minimally expressed, a log scale is applied. Arrows indicate estimated peak-to-peak duration. All data are presented as the mean  $\pm$  SD. ES, embryonic stem; PSM presomitic mesoderm.

## Figure S2

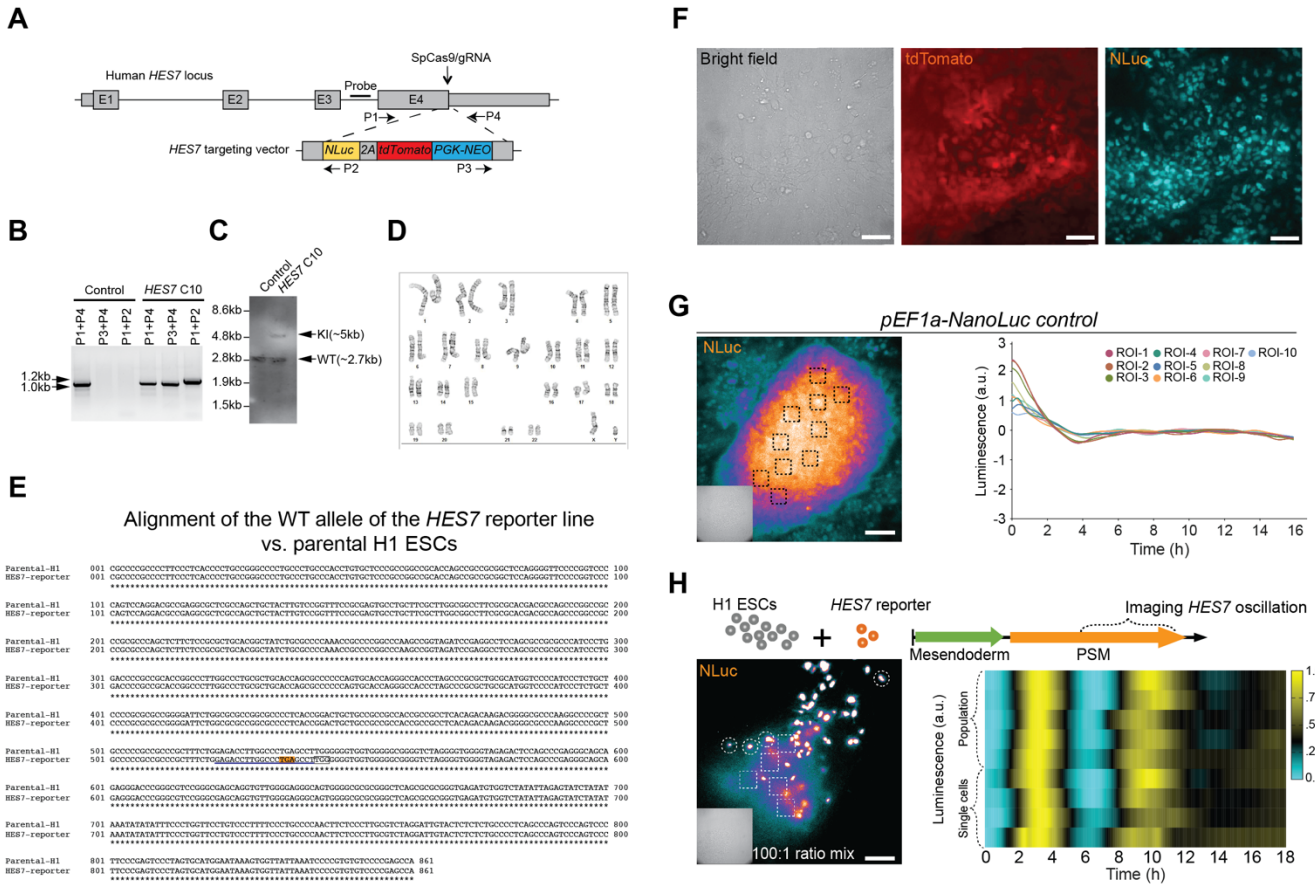

**Supplemental Figure 2, related to Figure 2. Detection and quantification of *HES7* oscillation. (A)** Gene targeting strategy of knock-in *HES7-NLuc-2A-tdTomato-PGK-NEO* cassette. The position of the CRISPR-Cas9/gRNA cut site is indicated. Gray boxes indicate the exons of *HES7*. The positions of DNA oligos used for junction PCR and Southern blotting probe are indicated. **(B)** Junctional PCR to confirm the knock-in cassette of the correct targeted clone, C10. Control: genomic DNA from parental H1 human ES cells. **(C)** Southern blotting result of correct targeted clone, C10. Control: genomic DNA from parental H1 cells. **(D)** Confirmed normal karyotype of the correctly targeted clone after expansion. **(E)** Pairwise alignment results confirmed 100% match of WT allele sequences obtained from parental H1 human ESC and *HES7*-reporter lines. WT allele specific primers were used to amplify ~861 bps surrounding the CRISPR-Cas9 cutting site. Stop codon is highlighted in orange. The gRNA sequences is indicated by underline, PAM domain is indicated by a box. **(F)** Live cell images of *HES7* reporter line differentiated to PSM state with brightfield, *tdTomato* and *NLuc* expression. Luminescence detection channel (*NLuc*) is pseudo colored in cyan. All scale bars = 100  $\mu$ m. **(G)** Negative control for oscillatory luminescence imaging analysis. A control H1 human ES cells carry a

*NLuc* transgene expression under the control of a constitutive promoter (*EF1a*). Left panel, a representative frame of *NLuc* luminescence overlay with the locations of 10 region of interests (ROIs) indicated in black boxes. Right panel, quantification results of 10 ROIs over 16 hours of time lapse imaging. The y axis indicates the luminescence signals (scaled from minimum to maximum from representative samples, arbitrary unit [a.u.]). Insert shows the corresponding brightfield image. **(H)** Upper panel, experimental strategy for mixing *HES7* reporter line with parental H1 human ES cells for luminescence imaging analysis. Left panel, a representative frame of *NLuc* luminescence overlay with the locations of 5 multiple-cell ROIs (white boxes) and 5 single-cell ROIs (white circles). Right panel, the quantification results of all 10 ROIs over 18 hours of time-lapse imaging shown in heatmap. The y axis indicates the luminescence signals (scaled from minimum to maximum from representative samples, in a.u.). Insert shows the corresponding brightfield image. All scale bars = 100  $\mu$ m. ES, embryonic stem.

## Figure S3

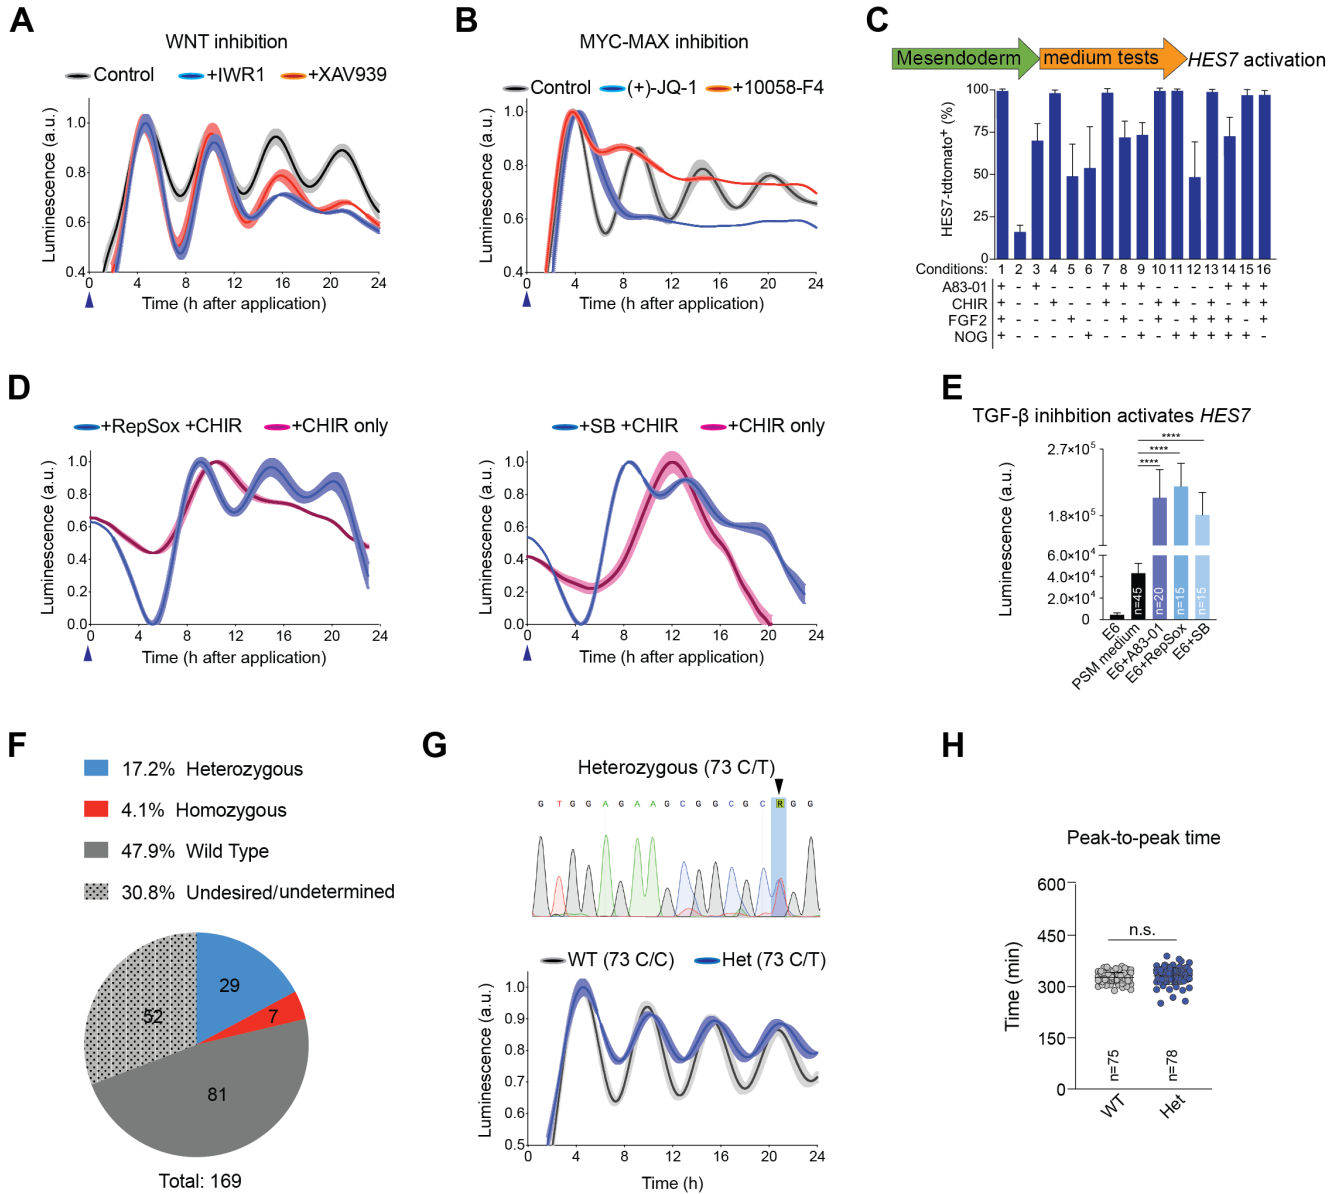

**Supplemental Figure 3, related to Figure 3. Characterizations of HES7 oscillation and modeling SCDO4 with genome editing.** (A) The impact of inhibiting WNT signaling on HES7 oscillation. The control data (PSM medium, black line) is obtained from the same experiment. Small molecules applied are indicated by color. The blue arrowhead indicates the time (0h) when the luciferin substrate and small molecules were applied. All luminescence oscillation data presented is scaled from minimum to maximum signal and shown as mean  $\pm$  SEM (shaded area), obtained from 4 to 5 replicates in each experiment, y axis in a.u. (B) The impact of inhibiting MYC-MAX transcriptional activity on HES7 oscillation. The data are annotated the same ways as in (A). (C) Medium test on the HES7 activation

measured by flow cytometry for the percentage of tdTomato-positive cells with combinations or dropouts of the small molecule inhibitors or growth factors in PSM medium. A total of 16 conditions are shown, with data collected from four independent differentiation experiments. All data are presented as the mean  $\pm$  SD. **(D)** Comparing *HES7* oscillation when replacing A83-01 (TGF- $\beta$  signaling inhibition) with RepSox or SB (SB 431542) in combination with CHIR (CHIR99021, WNT signaling activation) at the second day of differentiation (blue in both panels) as indicated in condition 7 in (C). No *HES7* oscillation is detected in CHIR only (magenta) condition as indicated in condition 4 in (C). All data are presented as the mean  $\pm$  SEM. **(E)** Quantification of *HES7* expression level after switching to indicated medium with TGF- $\beta$  inhibitors or controls. E6: base medium. Control: PSM medium. SB: SB-431542. \*\*\*\* p-value <0.0001, Student's t-test. Number of samples analyzed are indicated. All data are presented as the mean  $\pm$  SD. **(F)** Summary statistics for clones bearing point mutations in *HES7* locus. **(G)** Upper panel, sequencing results of a representative heterozygous clone for *HES7* 73C-T mutation. The arrowhead indicates the mutated nucleotide, highlighted as R (C/T). Lower panel, representative *HES7* oscillation profile overlay the parental line (black) and a heterozygous clone (blue). All data are presented as the mean  $\pm$  SEM. **(H)** Quantification of oscillation peak-to-peak time between the parental line and a representative heterozygous clone. n.s., not significant difference, Student's t-test. The number of peaks quantified are indicated.
